# Supplementary material for: Theoretical studies on thermally activated delayed fluorescence of “carbene–metal–amide” Cu and Au complexes: geometric structures, excitation characters, and mechanisms
Source: Royal Society of Chemistry journal article supplement (doi:10.1039/d3cp03444e), 2023-01-01
Supplement: d3cp03444e1.pdf [file d3cp03444e1.pdf]

## Electronic Supplementary Information

# Theoretical Studies on Thermally Activated Delayed Fluorescence of “Carbene-Metal-Amide” Cu and Au Complexes: Geometric Structures, Excitation Characters and Mechanisms

Xiu-Fang Song,<sup>a</sup> Ling-Ya Peng,<sup>a</sup> Wen-Kai Chen,<sup>a</sup> Yuan-Jun Gao<sup>\*c</sup> and Ganglong Cui<sup>\*a,b</sup>

<sup>a</sup> Key Laboratory of Theoretical and Computational Photochemistry, Ministry of Education, Chemistry College, Beijing Normal University, Beijing 100875, P. R. China

<sup>b</sup> Hefei National Laboratory, Hefei 230088, China

<sup>c</sup> State Key Laboratory of Organometallic Chemistry, Shanghai Institute of Organic Chemistry, Chinese Academy of Sciences, Shanghai 200032, P. R. China

Email: [yuanjun.gao@sioc.ac.cn](mailto:yuanjun.gao@sioc.ac.cn) and [ganglong.cui@bnu.edu.cn](mailto:ganglong.cui@bnu.edu.cn)

## Table of Contents

### I Figures

1. **Fig. S1.** Relaxed potential energy scan of the  $S_0$ ,  $S_1$ , and  $T_1$  states with N1-C1-N2-C3 dihedral angles by DFT/PCM, TD-DFT/PCM and UDFT/PCM methods, respectively.
2. **Fig. S2.** HOMO and LUMO distributions at coplanar and perpendicular  $S_0$ ,  $S_1$  and  $T_1$  minima of the CAAC-Cu-Cz complex.
3. **Fig. S3.** HOMO and LUMO distributions at coplanar and perpendicular  $S_0$ ,  $S_1$  and  $T_1$  minima of the CAAC-Au-Cz complex.
4. **Fig. S4.** Composition analysis and distribution of selected frontier molecular orbitals at the  $S_0$ ,  $S_1$  and  $T_1$  minima of two CMA complexes.
5. **Fig. S5.** The corresponding NTO distribution and weight of CAAC-Cu-Cz and CAAC-Au-Cz complexes.
6. **Fig. S6.** Related energies of the  $S_1$ ,  $T_1$ , and  $T_2$  states at the coplanar and perpendicular  $S_1$  and  $T_1$  minima with respect to the energy of coplanar  $S_0$  minima of two CMA complexes.
7. **Fig. S7.** Huang-Rhys factor distributions corresponding to different vibrational modes at perpendicular structures in two CMA complexes.

## **II Tables**

1. **Table S1.** Calculate Key Bond Angle and Dihedral Angles at the Different  $S_0$ ,  $S_1$  and  $T_1$  Minimum-Energy Geometry and Crystal Structures of Two CMA Complexes.
2. **Table S2.** The RMSD Values between  $S_0$ ,  $S_1$  and  $T_1$  Minima at Perpendicular Minima of the Two CMA Complexes.
3. **Table S3.** TD-PBE0/PCM Calculated Vertical Energies, Wavelength, Oscillator Strengths and Electronic Configurations at the  $S_0$ ,  $S_1$  and  $T_1$  Minima and Available Experiment Data of Two CMA Complexes.
4. **Table S4.** Percentage of Each Excitation Character Estimated by NTOs at the Coplanar  $S_0$ ,  $S_1$  and  $T_1$  minima of Two CMA complexes.
5. **Table S5.** Percentage of Excitation Character Estimated by NTOs at the Coplanar  $S_0$ ,  $S_1$  and  $T_1$  Minima of Two CMA complexes.
6. **Table S6.** Related Energies of the  $S_1$ ,  $T_1$ , and  $T_2$  States at the  $S_1$  and  $T_1$  Minima with Respect to the Energy of Coplanar  $S_0$  minima of Two CMA Complexes in Solution.
7. **Table S7.** Boltzmann Distribution (300 K) of  $T_2:T_1$  at  $T_1$  Minima of Two CMA Complexes.
8. **Table S8.** Reorganization Energies between  $S_1$  and  $T_1$  Minima of Two CMA Complexes.
9. **Table S9.** Temperature-Dependence of (Reverse) Intersystem Crossing Rates between Coplanar  $S_1$  and  $T_1$  States of Two CMA Complexes.

## **III Modified Parameters of 2-MeTHF solution**

## **IV Cartesian Coordinates of Optimized Structures**

## I Figures

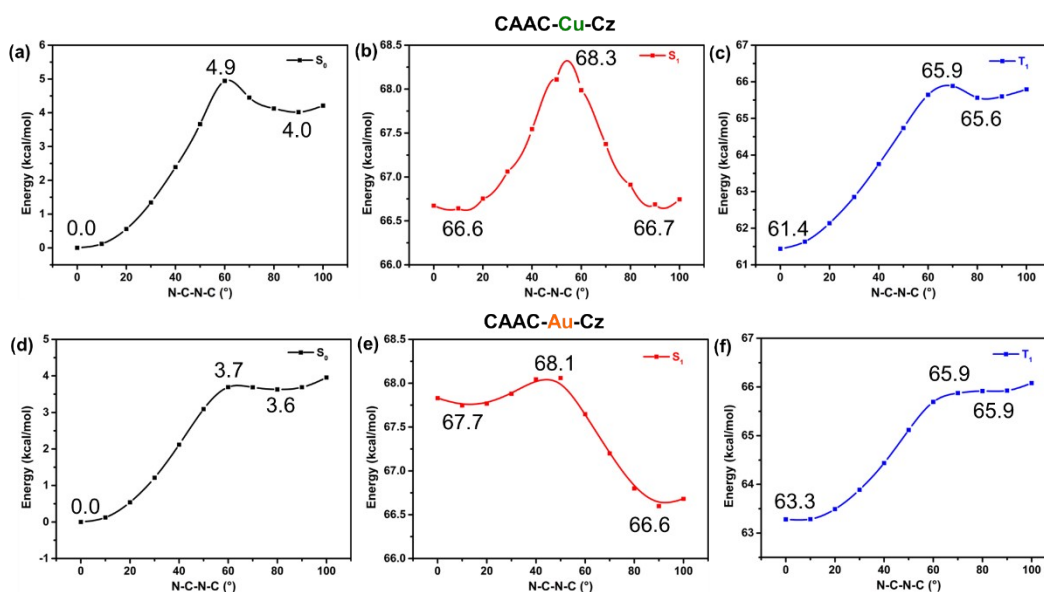

**Fig. S1.** Relaxed potential energy scan of the  $S_0$ ,  $S_1$ , and  $T_1$  states of (a-c) CAAC-Cu-Cz and (d-f) CAAC-Au-Cz with respect to their N1-C1-N2-C3 dihedral angles by DFT/PCM, TD-DFT/PCM and UDFT/PCM methods, respectively. The energetic zero point is assigned to the energy of the coplanar  $S_0$  geometries.

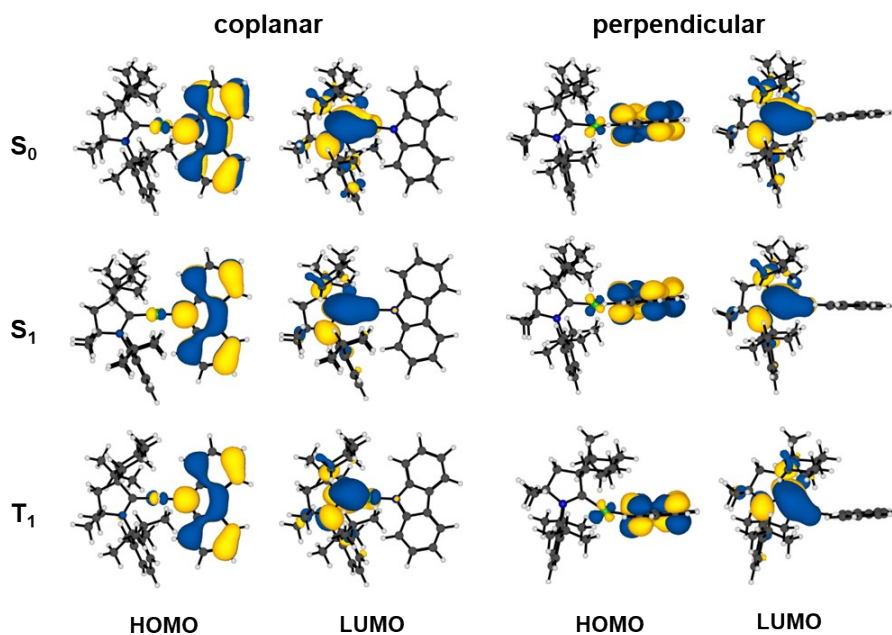

**Fig. S2.** HOMO and LUMO distributions at the coplanar and perpendicular  $S_0$ ,  $S_1$  and  $T_1$  minima of the CAAC-Cu-Cz complex.

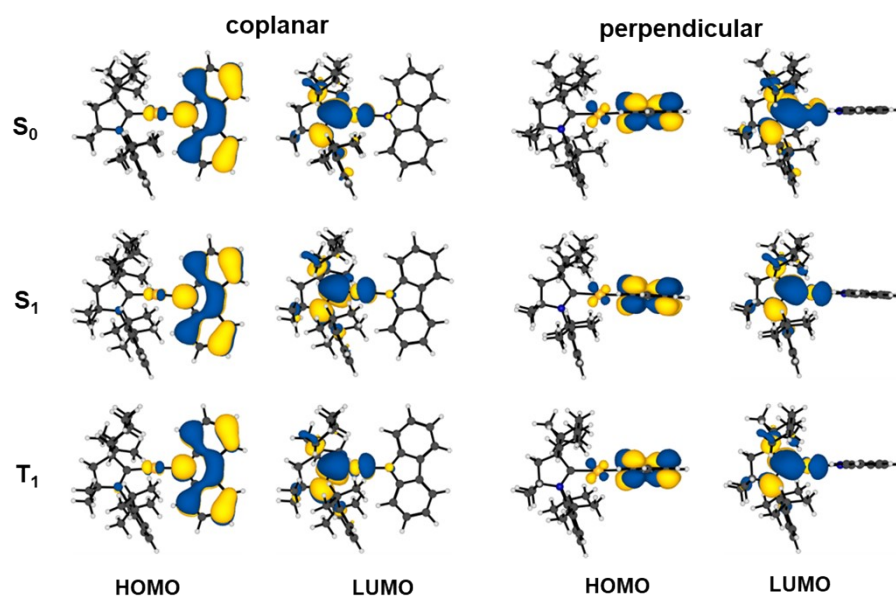

**Fig. S3.** HOMO and LUMO distributions at the coplanar and perpendicular  $S_0$ ,  $S_1$  and  $T_1$  minima of the CAAC-Au-Cz complex.

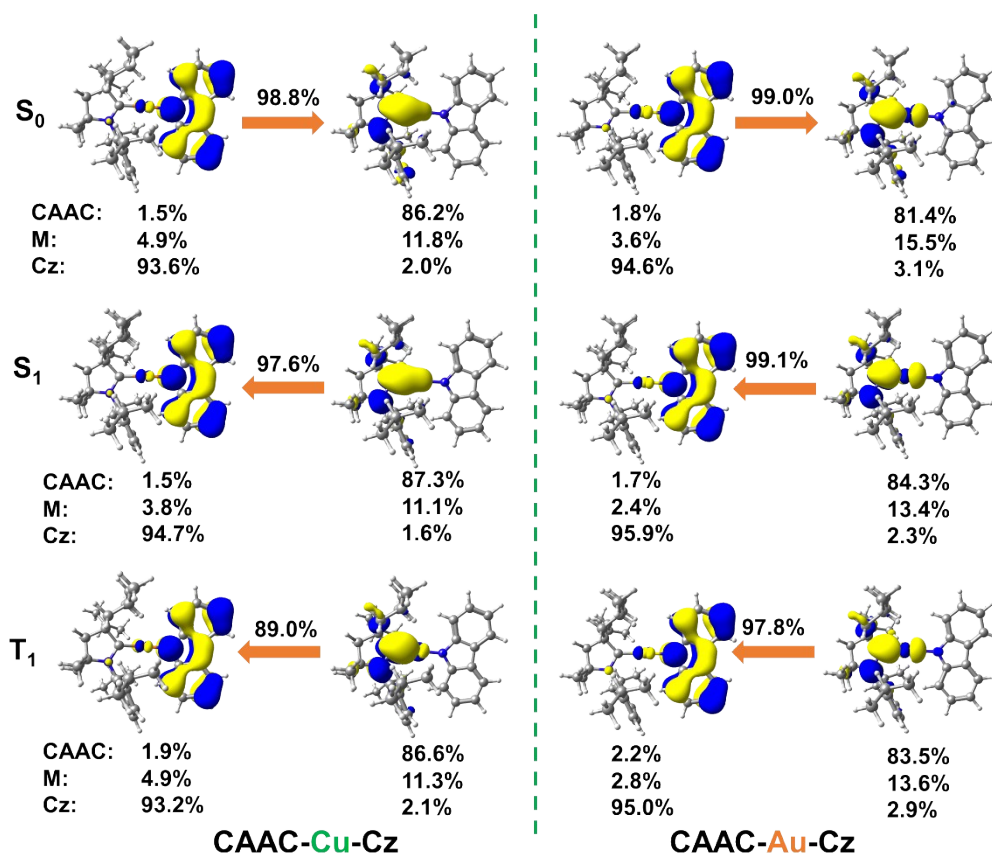

**Fig. S4.** Composition analysis and distribution of selected frontier molecular orbitals at the  $S_0$ ,  $S_1$  and  $T_1$  minima of two CMA complexes.

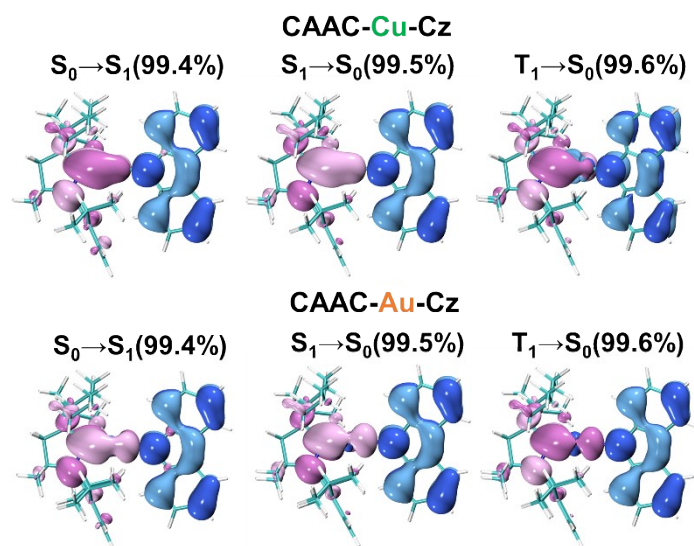

**Fig. S5.** The corresponding NTO distributions and weights of the CAAC-Cu-Cz and CAAC-Au-Cz complexes. Blue and pink are for hole and electron, respectively.

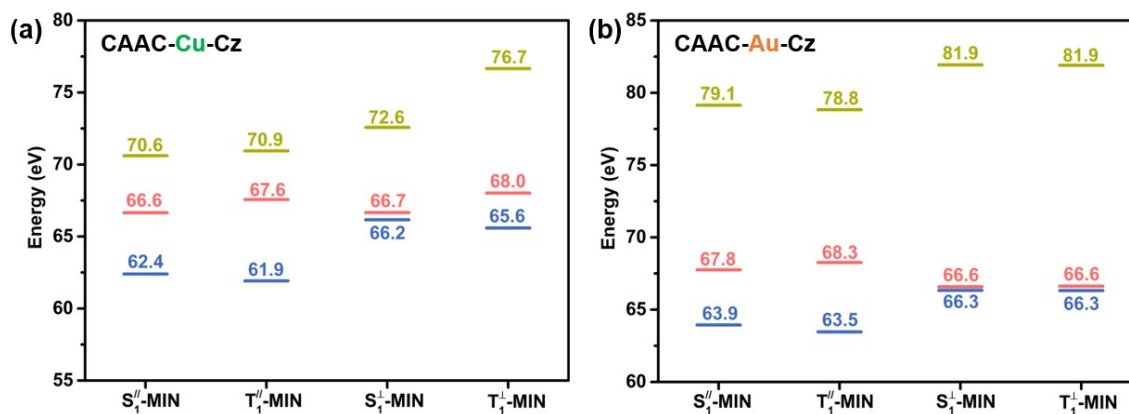

**Fig. S6.** Related energies of the  $S_1$  (red),  $T_1$  (blue), and  $T_2$  (yellow) states at the coplanar and perpendicular  $S_1$  and  $T_1$  minima with respect to the energy of the coplanar  $S_0$  minima of the two CMA complexes.

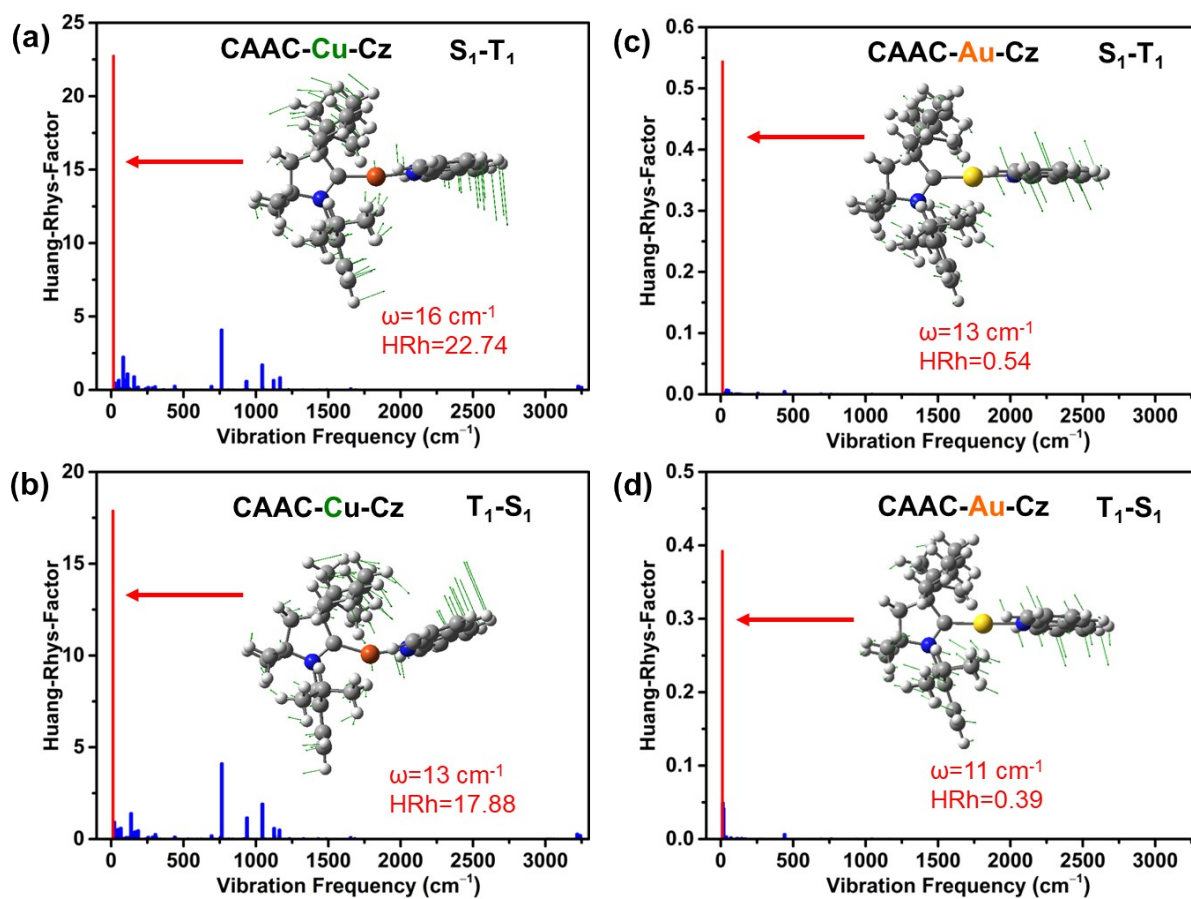

**Fig. S7.** Huang-Rhys factor distributions corresponding to different vibrational modes at the perpendicular structures: (a) ISC and (b) rISC in CAAC-Cu-Cz; (c) ISC and (d) rISC in CAAC-Au-Cz. The red lines represent the vibrational mode that has largest impact on the Huang-Rhys factor, the inset is the corresponding vibrational mode.

## II Tables

**Table S1.** Calculate Key Bond Angle (C-Cu-N, in degree) and Dihedral Angles (N-C-N-C, in degree) at the Different  $S_0$ ,  $S_1$  and  $T_1$  Minimum-Energy Geometry and Crystal Structures of Two CMA Complexes.

| Complexes  | Geometry State | Crystal | Coplanar |         |         | Perpendicular |             |             |
|------------|----------------|---------|----------|---------|---------|---------------|-------------|-------------|
|            |                |         | $S_0//$  | $S_1//$ | $T_1//$ | $S_0^\perp$   | $S_1^\perp$ | $T_1^\perp$ |
| CAAC-Cu-Cz | C-Cu-N         | 173.5   | 175.8    | 171.9   | 167.9   | 173.2         | 173.0       | 154.8       |
|            | N-C-N-C        | -1.3    | 1.7      | 8.0     | 4.1     | 88.1          | 93.2        | 105.7       |
| CAAC-Au-Cz | C-Au-N         | 176.2   | 176.5    | 174.6   | 175.4   | 176.5         | 177.6       | 177.9       |
|            | N-C-N-C        | 0.3     | 1.1      | 14.5    | 6.0     | 80.3          | 91.8        | 89.3        |

**Table S2.** The RMSD Values (in Å) between  $S_0$ ,  $S_1$  and  $T_1$  Minima at Perpendicular Minima of the Two CMA Complexes.

| Complexes  | $S_0$ - $S_1$ | $S_0$ - $T_1$ | $S_1$ - $T_1$ |
|------------|---------------|---------------|---------------|
| CAAC-Cu-Cz | 0.0974        | 0.3549        | 0.3944        |
| CAAC-Au-Cz | 0.1983        | 0.1397        | 0.0727        |

**Table S3.** TD-PBE0/PCM Calculated Vertical Energies ( $E_\perp$ , kcal/mol), Wavelength ( $\lambda$ , nm) Oscillator Strengths ( $f$ ) and Electronic Configurations at the  $S_0$ ,  $S_1$  and  $T_1$  Minima and Available Experiment Data of Two CMA Complexes.

| Structure                 | State            | $E_\perp$<br>(kcal/mol) | $\lambda$<br>(nm) | $f$ | Configuration | Exp. <sup>a</sup><br>(nm) |     |
|---------------------------|------------------|-------------------------|-------------------|-----|---------------|---------------------------|-----|
| <b>CAAC-Cu-Cz</b>         |                  |                         |                   |     |               |                           |     |
| Coplanar<br>Geometry      | $S_0//$ -MIN     | $S_1$                   | 73.6              | 389 | 0.1138        | HOMO->LUMO (98.8%)        | 388 |
|                           |                  | $T_1$                   | 68.6              | 417 | 0             | HOMO->LUMO (89.6%)        | -   |
|                           | $S_1//$ -MIN     | $S_1$                   | 58.8              | 486 | 0.1019        | HOMO←LUMO (97.6%)         | 474 |
|                           | $T_1//$ -MIN     | $T_1$                   | 55.0              | 520 | 0             | HOMO←LUMO (89.0%)         | -   |
| Perpendicular<br>Geometry | $S_0^\perp$ -MIN | $S_1$                   | 69.8              | 409 | 0.0027        | HOMO->LUMO (97.1%)        |     |
|                           |                  | $T_1$                   | 69.8              | 409 | 0             | HOMO->LUMO (94.8%)        |     |
|                           | $S_1^\perp$ -MIN | $S_1$                   | 55.3              | 517 | 0.0012        | HOMO←LUMO (97.6%)         |     |
|                           | $T_1^\perp$ -MIN | $T_1$                   | 52.9              | 540 | 0             | HOMO←LUMO (80.8%)         |     |

| CAAC-Au-Cz                |                                  |                |      |     |        |                    |     |
|---------------------------|----------------------------------|----------------|------|-----|--------|--------------------|-----|
| Coplanar<br>Geometry      | S <sub>0</sub> //-MIN            | S <sub>1</sub> | 74.7 | 383 | 0.1690 | HOMO->LUMO (99.0%) | 388 |
|                           |                                  | T <sub>1</sub> | 69.8 | 409 | 0      | HOMO->LUMO (88.5%) | -   |
|                           | S <sub>1</sub> //-MIN            | S <sub>1</sub> | 59.7 | 479 | 0.1479 | HOMO←LUMO (99.1%)  | 502 |
|                           | T <sub>1</sub> //-MIN            | T <sub>1</sub> | 56.1 | 509 | 0      | HOMO←LUMO (97.8%)  | -   |
| Perpendicular<br>Geometry | S <sub>0</sub> <sup>⊥</sup> -MIN | S <sub>1</sub> | 70.2 | 407 | 0.0082 | HOMO->LUMO (98.9%) |     |
|                           |                                  | T <sub>1</sub> | 69.8 | 409 | 0      | HOMO->LUMO (98.5%) |     |
|                           | S <sub>1</sub> <sup>⊥</sup> -MIN | S <sub>1</sub> | 55.3 | 517 | 0.0005 | HOMO←LUMO (99.2%)  |     |
|                           | T <sub>1</sub> <sup>⊥</sup> -MIN | T <sub>1</sub> | 55.1 | 519 | 0      | HOMO←LUMO (99.0%)  |     |

<sup>a</sup>Experimental values in the 2-MeTHF solution in ref<sup>54</sup>

**Table S4.** Percentage of Each Excitation Character Estimated by NTOs at the Coplanar S<sub>0</sub>, S<sub>1</sub> and T<sub>1</sub> minima of Two CMA complexes.

| Complex    | CAAC-Cu-Cz       |                     |                     | CAAC-Au-Cz          |                     |                     |                     |
|------------|------------------|---------------------|---------------------|---------------------|---------------------|---------------------|---------------------|
|            | Excitation State | S <sub>1</sub> (FC) | S <sub>1</sub> -MIN | T <sub>1</sub> -MIN | S <sub>1</sub> (FC) | S <sub>1</sub> -MIN | T <sub>1</sub> -MIN |
| Cz->M      |                  | 11.8%               | 10.20%              | 9.7%                | 16.0%               | 14.4%               | 13.9%               |
| CAAC->M    |                  | 0.2%                | 0.50%               | 0.7%                | 0.4%                | 0.3%                | 0.5%                |
| Cz->CAAC   |                  | 77.9%               | 77.10%              | 63.4%               | 73.9%               | 78.1%               | 74.4%               |
| CAAC->Cz   |                  | 0.0%                | 0.1%                | 0.1%                | 0.1%                | 0.1%                | 0.1%                |
| M->Cz      |                  | 0.20%               | 0.1%                | 0.4%                | 0.2%                | 0.1%                | 0.2%                |
| M->CAAC    |                  | 5.3%                | 5.8%                | 17.2%               | 3.3%                | 2.2%                | 5.1%                |
| Cz->Cz     |                  | 2.4%                | 1.9%                | 1.5%                | 3.8%                | 2.7%                | 2.4%                |
| CAAC->CAAC |                  | 1.4%                | 3.5%                | 4.4%                | 1.7%                | 1.7%                | 2.5%                |
| M->M       |                  | 0.8%                | 0.8%                | 2.6%                | 0.7%                | 0.4%                | 1.0%                |



**Table S5.** Percentage of Excitation Character Estimated by NTOs at the Coplanar  $S_0$ ,  $S_1$  and  $T_1$  minima of Two CMA complexes.

| Structure         | Excitation State | LMCT <sup>a</sup> | LLCT <sup>b</sup> | MLCT <sup>c</sup> | LE <sup>d</sup> | CT <sup>e</sup> |
|-------------------|------------------|-------------------|-------------------|-------------------|-----------------|-----------------|
| <b>CAAC-Cu-Cz</b> |                  |                   |                   |                   |                 |                 |
| $S_0$ -MIN        | $S_1$ (FC)       | 12.0%             | 77.9%             | 5.4%              | 4.6%            | 95.4%           |
| $S_1$ -MIN        | $S_1$ -MIN       | 10.7%             | 77.2%             | 6.0%              | 6.1%            | 93.9%           |
| $T_1$ -MIN        | $T_1$ -MIN       | 10.3%             | 63.5%             | 17.6%             | 8.5%            | 91.5%           |
| <b>CAAC-Au-Cz</b> |                  |                   |                   |                   |                 |                 |
| $S_0$ -MIN        | $S_1$ (FC)       | 16.4%             | 74.0%             | 3.5%              | 6.2%            | 93.8%           |
| $S_1$ -MIN        | $S_1$ -MIN       | 14.8%             | 78.2%             | 2.3%              | 4.8%            | 95.2%           |
| $T_1$ -MIN        | $T_1$ -MIN       | 14.3%             | 74.5%             | 5.3%              | 5.9%            | 94.1%           |

Note: LMCT<sup>a</sup> includes Cz->M and CAAC->M; LLCT<sup>b</sup> includes Cz->CAAC and CAAC->Cz; MLCT<sup>c</sup> includes M->Cz and M->CAAC; LE<sup>d</sup> includes Cz->Cz, CAAC->CAAC, and M->M; CT<sup>e</sup> includes LMCT, MLCT and LLCT

**Table S6.** Related Energies (kcal/mol) of the  $S_1$ ,  $T_1$ , and  $T_2$  States at the  $S_1$  and  $T_1$  Minima with Respect to the Energy of Coplanar  $S_0$  minima of Two CMA Complexes in Solution.

|            |       | At S// | At T// | At S⊥ | At T⊥ |
|------------|-------|--------|--------|-------|-------|
|            |       | 1      | 1      | 1     | 1     |
| CAAC-Cu-Cz | $S_1$ | 66.6   | 67.6   | 66.7  | 68.0  |
|            | $T_1$ | 62.4   | 61.9   | 66.2  | 65.6  |
|            | $T_2$ | 70.6   | 70.9   | 72.6  | 76.7  |
| CAAC-Au-Cz | $S_1$ | 67.8   | 68.3   | 66.6  | 66.6  |
|            | $T_1$ | 63.9   | 63.5   | 66.3  | 66.3  |
|            | $T_2$ | 79.1   | 78.8   | 81.9  | 81.9  |

**Table S7.** Boltzmann Distribution (300 K) of T<sub>2</sub>:T<sub>1</sub> at T<sub>1</sub> Minima of Two CMA Complexes.

|                                | CAAC-Cu-Cz            |                       | CAAC-Au-Cz             |                        |
|--------------------------------|-----------------------|-----------------------|------------------------|------------------------|
|                                | coplanar              | perpendicular         | coplanar               | perpendicular          |
| T <sub>2</sub> :T <sub>1</sub> | 1:3.6×10 <sup>6</sup> | 1:1.2×10 <sup>8</sup> | 1:1.4×10 <sup>11</sup> | 1:2.3×10 <sup>11</sup> |

**Table S8.** Reorganization Energies (in eV) between S<sub>1</sub> and T<sub>1</sub> Minima of Two CMA Complexes.

| Compound   | coplanar                       |                                | perpendicular                  |                                |
|------------|--------------------------------|--------------------------------|--------------------------------|--------------------------------|
|            | S <sub>1</sub> -T <sub>1</sub> | T <sub>1</sub> -S <sub>1</sub> | S <sub>1</sub> -T <sub>1</sub> | T <sub>1</sub> -S <sub>1</sub> |
| CAAC-Cu-Cz | 0.417                          | 0.356                          | 1.598                          | 1.581                          |
| CAAC-Au-Cz | 0.024                          | 0.027                          | 0.002                          | 0.002                          |

**Table S9.** Temperature-Dependence of (Reverse) Intersystem Crossing Rates ( $k_{(r)ISC}$ , s<sup>-1</sup>) between Coplanar S<sub>1</sub> and T<sub>1</sub> States of Two CMA Complexes.

| Temperature (K) | CAAC-Cu-Cz                   |                               | CAAC-Au-Cz                   |                               |
|-----------------|------------------------------|-------------------------------|------------------------------|-------------------------------|
|                 | $k_{ISC}$ (s <sup>-1</sup> ) | $k_{rISC}$ (s <sup>-1</sup> ) | $k_{ISC}$ (s <sup>-1</sup> ) | $k_{rISC}$ (s <sup>-1</sup> ) |
| 300             | 1.64×10 <sup>10</sup>        | 4.78×10 <sup>7</sup>          | 5.36×10 <sup>10</sup>        | 1.10×10 <sup>8</sup>          |
| 250             | 2.28×10 <sup>10</sup>        | 1.47×10 <sup>6</sup>          | 5.65×10 <sup>10</sup>        | 2.81×10 <sup>7</sup>          |
| 200             | 3.15×10 <sup>10</sup>        | 2.13×10 <sup>6</sup>          | 5.92×10 <sup>10</sup>        | 3.52×10 <sup>6</sup>          |
| 150             | 4.26×10 <sup>10</sup>        | 6.98×10 <sup>4</sup>          | 6.12×10 <sup>10</sup>        | 1.08×10 <sup>5</sup>          |
| 100             | 5.57×10 <sup>10</sup>        | 5.61×10 <sup>1</sup>          | 6.14×10 <sup>10</sup>        | 1.03×10 <sup>2</sup>          |
| 77              | 6.20×10 <sup>10</sup>        | 3.04×10 <sup>0</sup>          | 5.98×10 <sup>10</sup>        | 3.81                          |

### **III Modified Parameters of 2-MeTHF solution**

PCM model with two modified parameters in Gaussian 16:

Eps=7.0                    # Dielectric constant at 298 K ( $\epsilon=7.0$ ).

Epsinf=1.976836        # Square of the index of refraction at optical frequencies at 293 K ( $n_{20}^D$ ).

CPCM model with two modified parameters in ORCA 5.0.1:

Eps=7.0                    # Dielectric constant

Refrac=1.406

# The index of refraction at optical frequencies at 293 K ( $n_{20}^D$ )

## IV Cartesian Coordinates of Optimized Structures

In xyz format (unit: Angstrom)

CAAC-Cu-Cz

| S0-MIN            |                     |           |           |                        |                     |           |           |
|-------------------|---------------------|-----------|-----------|------------------------|---------------------|-----------|-----------|
| Coplanar Geometry |                     |           |           | Perpendicular Geometry |                     |           |           |
| Energy            | -1820.764292 Hatree |           |           | Energy                 | -1820.757866 Hatree |           |           |
| Atom              | x                   | y         | z         | Atom                   | x                   | y         | z         |
| C                 | 3.328775            | 1.090803  | -0.138497 | C                      | 3.238474            | 1.180626  | 0.399320  |
| C                 | 3.224687            | 2.488596  | -0.047074 | C                      | 2.968042            | 2.173241  | 1.357395  |
| H                 | 2.243754            | 2.964153  | 0.027566  | H                      | 1.949775            | 2.332478  | 1.718103  |
| C                 | 4.389612            | 3.246641  | -0.050625 | C                      | 4.018605            | 2.947756  | 1.834869  |
| H                 | 4.319283            | 4.335687  | 0.020674  | H                      | 3.814892            | 3.722670  | 2.579279  |
| C                 | 5.658241            | 2.641015  | -0.143152 | C                      | 5.337879            | 2.756528  | 1.379813  |
| H                 | 6.555556            | 3.264976  | -0.143834 | H                      | 6.142291            | 3.381460  | 1.775852  |
| C                 | 5.773750            | 1.257248  | -0.231029 | C                      | 5.618300            | 1.781113  | 0.428545  |
| H                 | 6.758891            | 0.786819  | -0.300209 | H                      | 6.641137            | 1.634539  | 0.069501  |
| C                 | 4.613333            | 0.472420  | -0.228234 | C                      | 4.574197            | 0.990997  | -0.069551 |
| C                 | 4.354529            | -0.944024 | -0.293646 | C                      | 4.491707            | -0.063771 | -1.045968 |
| C                 | 5.160253            | -2.086962 | -0.385811 | C                      | 5.424081            | -0.705961 | -1.871251 |
| H                 | 6.249351            | -1.994379 | -0.428931 | H                      | 6.480946            | -0.426476 | -1.832117 |
| C                 | 4.557536            | -3.340646 | -0.419915 | C                      | 4.988732            | -1.698360 | -2.743264 |
| H                 | 5.174182            | -4.240308 | -0.491014 | H                      | 5.704648            | -2.207521 | -3.393435 |
| C                 | 3.154579            | -3.461015 | -0.360959 | C                      | 3.625157            | -2.047770 | -2.799789 |
| H                 | 2.697389            | -4.454450 | -0.384905 | H                      | 3.298949            | -2.823391 | -3.498440 |
| C                 | 2.335659            | -2.342404 | -0.270787 | C                      | 2.683328            | -1.425045 | -1.989608 |
| H                 | 1.248918            | -2.442796 | -0.221430 | H                      | 1.627216            | -1.694510 | -2.050959 |
| C                 | 2.934788            | -1.072796 | -0.238876 | C                      | 3.112142            | -0.429790 | -1.095062 |
| C                 | -1.389161           | 0.545089  | 0.156558  | C                      | -1.377383           | 0.399658  | 0.200282  |
| C                 | -3.626768           | -0.290298 | 0.393699  | C                      | -3.626444           | -0.005831 | 0.934163  |
| C                 | -3.694094           | 1.245087  | 0.353787  | C                      | -3.668728           | 1.102771  | -0.126745 |
| H                 | -4.222336           | 1.575444  | -0.550490 | H                      | -4.187984           | 0.742382  | -1.024599 |
| H                 | -4.264858           | 1.632820  | 1.208607  | H                      | -4.236148           | 1.970709  | 0.235719  |
| C                 | -2.240717           | 1.773229  | 0.369837  | C                      | -2.207332           | 1.486042  | -0.450516 |
| C                 | -4.411376           | -0.936680 | -0.741257 | C                      | -4.463846           | -1.215797 | 0.540103  |
| H                 | -4.272310           | -2.027557 | -0.755926 | H                      | -4.350489           | -2.038506 | 1.260932  |
| H                 | -4.124203           | -0.529070 | -1.719961 | H                      | -4.205516           | -1.582398 | -0.462448 |
| H                 | -5.481748           | -0.733832 | -0.592406 | H                      | -5.523059           | -0.920900 | 0.527070  |
| C                 | -4.107604           | -0.862125 | 1.723680  | C                      | -4.070269           | 0.483380  | 2.309471  |
| H                 | -3.933232           | -1.946268 | 1.778710  | H                      | -3.920629           | -0.290253 | 3.076007  |
| H                 | -5.189835           | -0.689367 | 1.810463  | H                      | -5.143860           | 0.716625  | 2.270508  |
| H                 | -3.621638           | -0.379317 | 2.581889  | H                      | -3.540647           | 1.395303  | 2.615439  |
| C                 | -1.601543           | -1.854958 | 0.174015  | C                      | -1.661966           | -1.399618 | 1.795693  |
| C                 | -1.475484           | -2.511290 | -1.068088 | C                      | -1.621330           | -2.720418 | 1.304957  |
| C                 | -1.044757           | -3.842608 | -1.062985 | C                      | -1.263422           | -3.739017 | 2.194140  |
| H                 | -0.940183           | -4.372725 | -2.012293 | H                      | -1.226780           | -4.770705 | 1.836962  |
| C                 | -0.716343           | -4.490728 | 0.121799  | C                      | -0.927126           | -3.459278 | 3.513238  |
| H                 | -0.385333           | -5.531763 | 0.103346  | H                      | -0.657319           | -4.270259 | 4.193898  |
| C                 | -0.758392           | -3.793993 | 1.323934  | C                      | -0.890451           | -2.140707 | 3.951015  |

|    |           |           |           |
|----|-----------|-----------|-----------|
| H  | -0.430783 | -4.286784 | 2.241914  |
| C  | -1.185776 | -2.463152 | 1.378873  |
| C  | -1.645155 | -1.800964 | -2.398502 |
| H  | -2.065059 | -0.804369 | -2.203561 |
| C  | -0.268088 | -1.589802 | -3.036678 |
| H  | -0.359627 | -1.013073 | -3.969585 |
| H  | 0.209620  | -2.552938 | -3.275006 |
| H  | 0.409579  | -1.042476 | -2.362294 |
| C  | -2.584592 | -2.527364 | -3.359126 |
| H  | -2.721991 | -1.932794 | -4.275375 |
| H  | -3.574765 | -2.700397 | -2.913547 |
| H  | -2.176854 | -3.504225 | -3.662079 |
| C  | -1.065356 | -1.708868 | 2.691459  |
| H  | -1.552087 | -0.732444 | 2.569457  |
| C  | 0.409881  | -1.431565 | 2.997653  |
| H  | 0.504445  | -0.834302 | 3.918027  |
| H  | 0.894631  | -0.875618 | 2.179389  |
| H  | 0.970144  | -2.369031 | 3.138848  |
| C  | -1.738156 | -2.424063 | 3.861763  |
| H  | -1.691046 | -1.797105 | 4.765375  |
| H  | -1.234843 | -3.374308 | 4.098268  |
| H  | -2.795282 | -2.646214 | 3.656255  |
| C  | -1.905533 | 2.309355  | 1.787691  |
| H  | -2.688710 | 3.047146  | 2.039748  |
| H  | -2.010421 | 1.491860  | 2.521274  |
| C  | -0.545215 | 2.980181  | 1.941360  |
| H  | 0.239040  | 2.229511  | 1.720761  |
| C  | -0.416216 | 4.100196  | 0.915233  |
| H  | 0.580268  | 4.567359  | 0.988509  |
| H  | -1.149902 | 4.892370  | 1.154964  |
| C  | -0.654408 | 3.587350  | -0.496083 |
| H  | 0.146761  | 2.873553  | -0.756259 |
| H  | -0.567592 | 4.412619  | -1.220928 |
| C  | -2.013119 | 2.907825  | -0.667701 |
| H  | -2.779092 | 3.658433  | -0.394863 |
| C  | -0.332855 | 3.469429  | 3.366019  |
| H  | 0.655950  | 3.940239  | 3.478899  |
| H  | -0.396654 | 2.640134  | 4.088097  |
| H  | -1.094999 | 4.216926  | 3.643613  |
| C  | -2.292933 | 2.508284  | -2.138056 |
| H  | -3.063049 | 1.717390  | -2.126202 |
| C  | -2.883324 | 3.683937  | -2.913364 |
| H  | -3.086142 | 3.407387  | -3.959762 |
| H  | -2.187032 | 4.538629  | -2.928317 |
| H  | -3.827882 | 4.029160  | -2.464537 |
| C  | -1.085816 | 1.938430  | -2.878380 |
| H  | -1.394702 | 1.517082  | -3.847270 |
| H  | -0.590424 | 1.136090  | -2.311019 |
| H  | -0.329561 | 2.712323  | -3.081420 |
| Cu | 0.477327  | 0.412302  | -0.026478 |

|    |           |           |           |
|----|-----------|-----------|-----------|
| H  | -0.563569 | -1.921860 | 4.970059  |
| C  | -1.241845 | -1.083588 | 3.105098  |
| C  | -1.793442 | -3.054506 | -0.164581 |
| H  | -2.170473 | -2.159266 | -0.678540 |
| C  | -0.414636 | -3.362023 | -0.755171 |
| H  | -0.473960 | -3.491499 | -1.846732 |
| H  | 0.004421  | -4.284107 | -0.322764 |
| H  | 0.293713  | -2.547191 | -0.540791 |
| C  | -2.771570 | -4.196430 | -0.429113 |
| H  | -2.892949 | -4.346117 | -1.512971 |
| H  | -3.763643 | -3.995569 | 0.000238  |
| H  | -2.408773 | -5.146556 | -0.007576 |
| C  | -1.028391 | 0.340304  | 3.585042  |
| H  | -1.462080 | 1.020915  | 2.840596  |
| C  | 0.473451  | 0.633525  | 3.631743  |
| H  | 0.655922  | 1.691951  | 3.874836  |
| H  | 0.951467  | 0.416203  | 2.664046  |
| H  | 0.974988  | 0.017724  | 4.394718  |
| C  | -1.684302 | 0.638536  | 4.931597  |
| H  | -1.549098 | 1.699944  | 5.190452  |
| H  | -1.232518 | 0.045962  | 5.742090  |
| H  | -2.762931 | 0.425725  | 4.921198  |
| C  | -1.857363 | 2.816092  | 0.271322  |
| H  | -2.636984 | 3.544855  | -0.015121 |
| H  | -1.957261 | 2.677996  | 1.361462  |
| C  | -0.495313 | 3.414408  | -0.058626 |
| H  | 0.284585  | 2.690843  | 0.245333  |
| C  | -0.373882 | 3.600496  | -1.566202 |
| H  | 0.624048  | 3.995756  | -1.817403 |
| H  | -1.108062 | 4.359890  | -1.895203 |
| C  | -0.616213 | 2.291057  | -2.300488 |
| H  | 0.194234  | 1.587903  | -2.038791 |
| H  | -0.539740 | 2.445848  | -3.388646 |
| C  | -1.975025 | 1.665777  | -1.978796 |
| H  | -2.738861 | 2.415823  | -2.259610 |
| C  | -0.256066 | 4.702586  | 0.713508  |
| H  | 0.740713  | 5.114578  | 0.492494  |
| H  | -0.318268 | 4.535366  | 1.800759  |
| H  | -1.004670 | 5.467892  | 0.447945  |
| C  | -2.267272 | 0.408426  | -2.834391 |
| H  | -3.071930 | -0.155845 | -2.331539 |
| C  | -2.803568 | 0.801487  | -4.209309 |
| H  | -3.025350 | -0.089667 | -4.816877 |
| H  | -2.067747 | 1.403816  | -4.766726 |
| H  | -3.728185 | 1.393916  | -4.126614 |
| C  | -1.085094 | -0.545214 | -2.979428 |
| H  | -1.402583 | -1.480730 | -3.465098 |
| H  | -0.650317 | -0.811934 | -2.004088 |
| H  | -0.279180 | -0.110821 | -3.590433 |
| Cu | 0.500904  | 0.255462  | 0.041122  |

|   |           |           |           |   |           |           |           |
|---|-----------|-----------|-----------|---|-----------|-----------|-----------|
| N | 2.321729  | 0.155557  | -0.150018 | N | 2.363536  | 0.313094  | -0.212421 |
| N | -2.146464 | -0.519818 | 0.215079  | N | -2.153290 | -0.345974 | 0.941816  |

S1-MIN

| Coplanar Geometry |                      |           |           | Perpendicular Geometry |                      |           |           |
|-------------------|----------------------|-----------|-----------|------------------------|----------------------|-----------|-----------|
| Energy            | -1820.658086 Hartree |           |           | Energy                 | -1820.658066 Hartree |           |           |
| Atom              | x                    | y         | z         | Atom                   | x                    | y         | z         |
| C                 | 3.357889             | 1.176394  | -0.045495 | C                      | 3.294721             | 1.129420  | 0.414254  |
| C                 | 3.183772             | 2.563441  | 0.074089  | C                      | 3.004901             | 2.095860  | 1.386197  |
| H                 | 2.180924             | 2.988829  | 0.144565  | H                      | 1.976758             | 2.259660  | 1.710740  |
| C                 | 4.324050             | 3.365379  | 0.095395  | C                      | 4.064309             | 2.835117  | 1.911393  |
| H                 | 4.219707             | 4.448335  | 0.188005  | H                      | 3.866257             | 3.594246  | 2.670663  |
| C                 | 5.601524             | 2.800722  | -0.003866 | C                      | 5.376240             | 2.618189  | 1.476170  |
| H                 | 6.477896             | 3.452191  | 0.012022  | H                      | 6.188145             | 3.209751  | 1.904460  |
| C                 | 5.780992             | 1.410359  | -0.123451 | C                      | 5.670573             | 1.657164  | 0.492856  |
| H                 | 6.786240             | 0.989327  | -0.196654 | H                      | 6.699326             | 1.505989  | 0.158818  |
| C                 | 4.660497             | 0.597264  | -0.142629 | C                      | 4.628495             | 0.917115  | -0.039132 |
| C                 | 4.431117             | -0.837997 | -0.235119 | C                      | 4.526567             | -0.119578 | -1.057819 |
| C                 | 5.239777             | -1.956570 | -0.339039 | C                      | 5.433034             | -0.764848 | -1.881407 |
| H                 | 6.327606             | -1.866902 | -0.379730 | H                      | 6.499720             | -0.534945 | -1.837498 |
| C                 | 4.630417             | -3.225286 | -0.388448 | C                      | 4.949770             | -1.727534 | -2.785296 |
| H                 | 5.259129             | -4.114461 | -0.471458 | H                      | 5.653305             | -2.244381 | -3.441384 |
| C                 | 3.239045             | -3.369973 | -0.332076 | C                      | 3.586444             | -2.032010 | -2.863589 |
| H                 | 2.794998             | -4.366910 | -0.369263 | H                      | 3.240671             | -2.778719 | -3.581060 |
| C                 | 2.407092             | -2.256159 | -0.231033 | C                      | 2.661980             | -1.392715 | -2.038073 |
| H                 | 1.320524             | -2.355533 | -0.189270 | H                      | 1.596068             | -1.613870 | -2.095544 |
| C                 | 3.011810             | -0.990100 | -0.184770 | C                      | 3.140029             | -0.439645 | -1.129599 |
| C                 | -1.387123            | 0.516985  | 0.039278  | C                      | -1.321337            | 0.379455  | 0.154971  |
| C                 | -3.618420            | -0.432958 | 0.221389  | C                      | -3.583073            | -0.011735 | 0.974351  |
| C                 | -3.728722            | 1.089137  | 0.005605  | C                      | -3.637281            | 0.986945  | -0.194834 |
| H                 | -4.086457            | 1.283545  | -1.015150 | H                      | -4.065854            | 0.486164  | -1.073959 |
| H                 | -4.469198            | 1.534982  | 0.686694  | H                      | -4.300417            | 1.834613  | 0.034890  |
| C                 | -2.321199            | 1.697192  | 0.210272  | C                      | -2.192414            | 1.451440  | -0.487294 |
| C                 | -4.366024            | -1.204398 | -0.866583 | C                      | -4.471624            | -1.226176 | 0.702195  |
| H                 | -4.198579            | -2.288663 | -0.773035 | H                      | -4.357171            | -1.990041 | 1.486888  |
| H                 | -4.050035            | -0.888809 | -1.870137 | H                      | -4.233797            | -1.685346 | -0.266896 |
| H                 | -5.447837            | -1.021037 | -0.779122 | H                      | -5.528564            | -0.919586 | 0.680688  |
| C                 | -4.181767            | -0.862941 | 1.578978  | C                      | -4.043091            | 0.623053  | 2.290520  |
| H                 | -4.003563            | -1.934783 | 1.751592  | H                      | -3.911122            | -0.079164 | 3.127055  |
| H                 | -5.268993            | -0.693251 | 1.605491  | H                      | -5.111773            | 0.880202  | 2.231476  |
| H                 | -3.731975            | -0.298764 | 2.406953  | H                      | -3.486843            | 1.542200  | 2.518636  |
| C                 | -1.549873            | -1.916808 | 0.149393  | C                      | -1.642806            | -1.393560 | 1.831212  |
| C                 | -1.305030            | -2.588227 | -1.073210 | C                      | -1.562261            | -2.718721 | 1.341324  |
| C                 | -0.795418            | -3.892515 | -1.037772 | C                      | -1.169953            | -3.742071 | 2.212183  |
| H                 | -0.619518            | -4.424748 | -1.976310 | H                      | -1.121637            | -4.770670 | 1.844526  |
| C                 | -0.484305            | -4.511576 | 0.168211  | C                      | -0.822328            | -3.470190 | 3.530972  |
| H                 | -0.095166            | -5.533122 | 0.177931  | H                      | -0.528875            | -4.282248 | 4.201550  |
| C                 | -0.631547            | -3.807230 | 1.359029  | C                      | -0.813202            | -2.153812 | 3.979573  |
| H                 | -0.330174            | -4.274228 | 2.300372  | H                      | -0.484482            | -1.935799 | 4.999323  |
| C                 | -1.142589            | -2.503756 | 1.372513  | C                      | -1.199960            | -1.100076 | 3.142869  |

|    |           |           |           |    |           |           |           |
|----|-----------|-----------|-----------|----|-----------|-----------|-----------|
| C  | -1.472474 | -1.898087 | -2.414198 | C  | -1.774620 | -3.039281 | -0.125948 |
| H  | -1.952581 | -0.928448 | -2.222839 | H  | -2.154104 | -2.125794 | -0.605292 |
| C  | -0.096306 | -1.596430 | -3.014599 | C  | -0.421347 | -3.348981 | -0.770215 |
| H  | -0.199135 | -1.041063 | -3.960216 | H  | -0.521689 | -3.470997 | -1.860569 |
| H  | 0.464133  | -2.522863 | -3.221498 | H  | 0.016499  | -4.274008 | -0.360875 |
| H  | 0.501853  | -0.981475 | -2.324580 | H  | 0.284685  | -2.526990 | -0.577562 |
| C  | -2.332054 | -2.689281 | -3.398527 | C  | -2.765698 | -4.175296 | -0.369876 |
| H  | -2.487338 | -2.110007 | -4.322415 | H  | -2.931093 | -4.314228 | -1.450117 |
| H  | -3.319411 | -2.928601 | -2.977451 | H  | -3.739616 | -3.975154 | 0.099969  |
| H  | -1.851531 | -3.638181 | -3.685977 | H  | -2.392642 | -5.132502 | 0.028224  |
| C  | -1.157626 | -1.732985 | 2.679826  | C  | -1.020062 | 0.326539  | 3.626072  |
| H  | -1.658971 | -0.776556 | 2.483173  | H  | -1.460085 | 0.982767  | 2.864358  |
| C  | 0.272470  | -1.401661 | 3.115379  | C  | 0.473642  | 0.655774  | 3.686376  |
| H  | 0.266406  | -0.790294 | 4.031983  | H  | 0.631610  | 1.720821  | 3.922431  |
| H  | 0.798044  | -0.830360 | 2.332779  | H  | 0.950260  | 0.443477  | 2.717124  |
| H  | 0.855651  | -2.314702 | 3.318250  | H  | 0.987574  | 0.057391  | 4.456270  |
| C  | -1.904487 | -2.456804 | 3.799044  | C  | -1.691653 | 0.613201  | 4.967245  |
| H  | -1.957614 | -1.821209 | 4.697047  | H  | -1.580222 | 1.676850  | 5.231401  |
| H  | -1.394700 | -3.389524 | 4.088878  | H  | -1.239248 | 0.026036  | 5.782374  |
| H  | -2.932295 | -2.715044 | 3.505907  | H  | -2.766422 | 0.381689  | 4.945151  |
| C  | -2.236298 | 2.262248  | 1.653513  | C  | -1.973101 | 2.823664  | 0.204678  |
| H  | -3.067448 | 2.979379  | 1.803554  | H  | -2.767601 | 3.521777  | -0.125663 |
| H  | -2.402845 | 1.438995  | 2.367785  | H  | -2.102565 | 2.695657  | 1.292202  |
| C  | -0.931064 | 2.972812  | 1.986256  | C  | -0.625349 | 3.473918  | -0.076268 |
| H  | -0.113856 | 2.236712  | 1.840629  | H  | 0.152177  | 2.764163  | 0.268326  |
| C  | -0.710492 | 4.109951  | 0.995398  | C  | -0.449684 | 3.649358  | -1.580020 |
| H  | 0.254774  | 4.608697  | 1.193774  | H  | 0.543344  | 4.077742  | -1.801274 |
| H  | -1.493575 | 4.876615  | 1.150577  | H  | -1.195342 | 4.381925  | -1.944422 |
| C  | -0.760668 | 3.608470  | -0.439850 | C  | -0.628681 | 2.327685  | -2.312450 |
| H  | 0.086308  | 2.919269  | -0.606288 | H  | 0.190676  | 1.646571  | -2.018384 |
| H  | -0.614989 | 4.447583  | -1.140716 | H  | -0.520379 | 2.480031  | -3.399556 |
| C  | -2.057857 | 2.871293  | -0.777433 | C  | -1.972263 | 1.657483  | -2.016360 |
| H  | -2.881395 | 3.587959  | -0.586808 | H  | -2.749710 | 2.391752  | -2.307886 |
| C  | -0.893154 | 3.444677  | 3.431559  | C  | -0.447839 | 4.776670  | 0.688205  |
| H  | 0.061839  | 3.941628  | 3.667337  | H  | 0.541492  | 5.223075  | 0.496650  |
| H  | -1.016922 | 2.601753  | 4.130544  | H  | -0.542562 | 4.618394  | 1.774828  |
| H  | -1.703164 | 4.166428  | 3.633195  | H  | -1.210616 | 5.517137  | 0.392377  |
| C  | -2.141214 | 2.501895  | -2.281860 | C  | -2.212687 | 0.411295  | -2.908187 |
| H  | -2.804531 | 1.624354  | -2.367027 | H  | -2.945881 | -0.228350 | -2.388279 |
| C  | -2.784881 | 3.635223  | -3.078131 | C  | -2.837103 | 0.818184  | -4.241731 |
| H  | -2.850020 | 3.387518  | -4.149997 | H  | -3.017205 | -0.058264 | -4.885058 |
| H  | -2.194944 | 4.563629  | -2.990994 | H  | -2.173650 | 1.502256  | -4.797740 |
| H  | -3.803147 | 3.854745  | -2.718995 | H  | -3.799435 | 1.334776  | -4.096780 |
| C  | -0.815650 | 2.092987  | -2.920795 | C  | -0.984217 | -0.463361 | -3.144458 |
| H  | -0.986735 | 1.708753  | -3.939415 | H  | -1.266450 | -1.382869 | -3.682574 |
| H  | -0.329454 | 1.300338  | -2.333269 | H  | -0.534883 | -0.750731 | -2.182732 |
| H  | -0.119104 | 2.942811  | -3.004371 | H  | -0.219144 | 0.050279  | -3.748548 |
| Cu | 0.489028  | 0.426366  | 0.102598  | Cu | 0.541532  | 0.250244  | 0.034025  |
| N  | 2.383922  | 0.218031  | -0.076625 | N  | 2.407390  | 0.299991  | -0.231456 |
| N  | -2.156197 | -0.633398 | 0.139646  | N  | -2.148133 | -0.363655 | 0.996565  |

## T1-MIN

| Coplanar Geometry |                      |           |           | Perpendicular Geometry |                      |           |           |
|-------------------|----------------------|-----------|-----------|------------------------|----------------------|-----------|-----------|
| Energy            | -1820.665611 Hartree |           |           | Energy                 | -1820.659761 Hartree |           |           |
| Atom              | x                    | y         | z         | Atom                   | x                    | y         | z         |
| C                 | 3.284649             | 1.189463  | -0.250573 | C                      | 3.179235             | 1.212008  | 0.376346  |
| C                 | 3.103190             | 2.572862  | -0.136143 | C                      | 2.937603             | 2.073620  | 1.453454  |
| H                 | 2.098476             | 2.998385  | -0.107555 | H                      | 2.024679             | 1.981120  | 2.043380  |
| C                 | 4.239352             | 3.376770  | -0.053694 | C                      | 3.889749             | 3.048871  | 1.743932  |
| H                 | 4.127169             | 4.459233  | 0.037242  | H                      | 3.719297             | 3.732533  | 2.578555  |
| C                 | 5.521903             | 2.814668  | -0.082210 | C                      | 5.058396             | 3.167864  | 0.979603  |
| H                 | 6.394865             | 3.467548  | -0.014620 | H                      | 5.786121             | 3.943829  | 1.227374  |
| C                 | 5.707108             | 1.427687  | -0.193417 | C                      | 5.307385             | 2.306491  | -0.096124 |
| H                 | 6.713948             | 1.004570  | -0.213338 | H                      | 6.222746             | 2.404924  | -0.684408 |
| C                 | 4.586815             | 0.613761  | -0.275890 | C                      | 4.366968             | 1.328728  | -0.398078 |
| C                 | 4.371538             | -0.822542 | -0.390078 | C                      | 4.275911             | 0.287138  | -1.407137 |
| C                 | 5.200809             | -1.932185 | -0.458066 | C                      | 5.096421             | -0.127716 | -2.449376 |
| H                 | 6.287796             | -1.826729 | -0.436451 | H                      | 6.049020             | 0.369933  | -2.645517 |
| C                 | 4.612213             | -3.204049 | -0.552882 | C                      | 4.677601             | -1.199945 | -3.246850 |
| H                 | 5.253390             | -4.086833 | -0.604097 | H                      | 5.310166             | -1.536785 | -4.071177 |
| C                 | 3.220987             | -3.362155 | -0.575655 | C                      | 3.458212             | -1.846861 | -3.004406 |
| H                 | 2.789551             | -4.363465 | -0.638764 | H                      | 3.153606             | -2.679417 | -3.642416 |
| C                 | 2.372584             | -2.257929 | -0.508035 | C                      | 2.624136             | -1.441192 | -1.964326 |
| H                 | 1.286669             | -2.373152 | -0.505302 | H                      | 1.669311             | -1.934480 | -1.779785 |
| C                 | 2.958580             | -0.989161 | -0.423772 | C                      | 3.038620             | -0.371117 | -1.162970 |
| C                 | -1.353188            | 0.512318  | 0.140168  | C                      | -1.260115            | 0.265102  | 0.261970  |
| C                 | -3.534579            | -0.426564 | 0.660077  | C                      | -3.586613            | 0.041089  | 0.909760  |
| C                 | -3.674923            | 1.093821  | 0.449534  | C                      | -3.474371            | 1.070747  | -0.231432 |
| H                 | -4.206387            | 1.280688  | -0.493898 | H                      | -3.907005            | 0.644551  | -1.146729 |
| H                 | -4.284066            | 1.548319  | 1.245222  | H                      | -4.057699            | 1.975460  | -0.004605 |
| C                 | -2.253358            | 1.704419  | 0.400879  | C                      | -1.976903            | 1.404284  | -0.441920 |
| C                 | -4.455221            | -1.207126 | -0.277528 | C                      | -4.531103            | -1.101030 | 0.536117  |
| H                 | -4.279638            | -2.290940 | -0.194818 | H                      | -4.532297            | -1.885506 | 1.308696  |
| H                 | -4.307157            | -0.909250 | -1.324569 | H                      | -4.247897            | -1.556608 | -0.422670 |
| H                 | -5.507041            | -1.015041 | -0.016403 | H                      | -5.559347            | -0.720292 | 0.439885  |
| C                 | -3.866118            | -0.833565 | 2.098980  | C                      | -4.096562            | 0.679470  | 2.203866  |
| H                 | -3.658611            | -1.902067 | 2.259403  | H                      | -4.078217            | -0.046918 | 3.029923  |
| H                 | -4.934781            | -0.663088 | 2.299933  | H                      | -5.136826            | 1.013943  | 2.072152  |
| H                 | -3.288363            | -0.253832 | 2.831390  | H                      | -3.495301            | 1.551843  | 2.493532  |
| C                 | -1.498311            | -1.919278 | 0.302815  | C                      | -1.790951            | -1.465031 | 1.909043  |
| C                 | -1.448958            | -2.632489 | -0.919593 | C                      | -1.758602            | -2.799428 | 1.437268  |
| C                 | -0.924928            | -3.931619 | -0.923709 | C                      | -1.467313            | -3.828997 | 2.339465  |
| H                 | -0.899020            | -4.496355 | -1.859445 | H                      | -1.456798            | -4.864012 | 1.987554  |
| C                 | -0.416276            | -4.505931 | 0.236344  | C                      | -1.171691            | -3.556127 | 3.670546  |
| H                 | -0.018983            | -5.524173 | 0.217443  | H                      | -0.957093            | -4.372894 | 4.364655  |
| C                 | -0.375837            | -3.760731 | 1.410373  | C                      | -1.111220            | -2.236003 | 4.104270  |
| H                 | 0.080404             | -4.192457 | 2.305006  | H                      | -0.822900            | -2.022518 | 5.136996  |
| C                 | -0.891000            | -2.459946 | 1.462869  | C                      | -1.396590            | -1.174326 | 3.238116  |
| C                 | -1.849730            | -1.995463 | -2.237568 | C                      | -1.912756            | -3.129518 | -0.035001 |
| H                 | -2.288433            | -1.015648 | -2.002917 | H                      | -2.201689            | -2.201394 | -0.547829 |



|    |           |           |           |    |           |           |           |
|----|-----------|-----------|-----------|----|-----------|-----------|-----------|
| C  | -0.605498 | -1.731137 | -3.090235 | C  | -0.553355 | -3.548078 | -0.601134 |
| H  | -0.877395 | -1.210968 | -4.022246 | H  | -0.604379 | -3.680224 | -1.693306 |
| H  | -0.094275 | -2.669744 | -3.359663 | H  | -0.206623 | -4.495027 | -0.156956 |
| H  | 0.114115  | -1.096370 | -2.549221 | H  | 0.205707  | -2.780384 | -0.383371 |
| C  | -2.871435 | -2.819962 | -3.019169 | C  | -2.968630 | -4.196490 | -0.316506 |
| H  | -3.188459 | -2.279081 | -3.924790 | H  | -3.080728 | -4.346979 | -1.401850 |
| H  | -3.767968 | -3.034083 | -2.419826 | H  | -3.950538 | -3.915494 | 0.090697  |
| H  | -2.448920 | -3.783678 | -3.345713 | H  | -2.689995 | -5.168444 | 0.120949  |
| C  | -0.702073 | -1.644186 | 2.728703  | C  | -1.170393 | 0.246899  | 3.718774  |
| H  | -1.239158 | -0.697880 | 2.585164  | H  | -1.503045 | 0.917133  | 2.915190  |
| C  | 0.775447  | -1.287491 | 2.913674  | C  | 0.328378  | 0.491875  | 3.911676  |
| H  | 0.909219  | -0.648324 | 3.801246  | H  | 0.524996  | 1.551196  | 4.142978  |
| H  | 1.157773  | -0.737464 | 2.040467  | H  | 0.887509  | 0.232137  | 2.998591  |
| H  | 1.395100  | -2.188965 | 3.048110  | H  | 0.735377  | -0.116515 | 4.735277  |
| C  | -1.248985 | -2.334413 | 3.977259  | C  | -1.935108 | 0.591281  | 4.995620  |
| H  | -1.162540 | -1.668884 | 4.850659  | H  | -1.782490 | 1.649877  | 5.258834  |
| H  | -0.688138 | -3.253526 | 4.210776  | H  | -1.587389 | -0.011199 | 5.849829  |
| H  | -2.307849 | -2.608541 | 3.864294  | H  | -3.015641 | 0.422797  | 4.885279  |
| C  | -1.932840 | 2.332272  | 1.781109  | C  | -1.673594 | 2.757673  | 0.251123  |
| H  | -2.724501 | 3.064928  | 2.034406  | H  | -2.371066 | 3.522742  | -0.142649 |
| H  | -1.980184 | 1.543281  | 2.550091  | H  | -1.890908 | 2.661653  | 1.328236  |
| C  | -0.586678 | 3.041516  | 1.854339  | C  | -0.250679 | 3.260661  | 0.055658  |
| H  | 0.189873  | 2.291174  | 1.604927  | H  | 0.424135  | 2.479262  | 0.453260  |
| C  | -0.538705 | 4.134829  | 0.792562  | C  | 0.042185  | 3.398680  | -1.433595 |
| H  | 0.443737  | 4.639283  | 0.804425  | H  | 1.088760  | 3.713915  | -1.586730 |
| H  | -1.286137 | 4.910627  | 1.045572  | H  | -0.593838 | 4.203150  | -1.850031 |
| C  | -0.831356 | 3.577280  | -0.592488 | C  | -0.226307 | 2.095505  | -2.172258 |
| H  | -0.018079 | 2.885632  | -0.880441 | H  | 0.501880  | 1.340149  | -1.831146 |
| H  | -0.814277 | 4.388327  | -1.339613 | H  | -0.041027 | 2.228587  | -3.251247 |
| C  | -2.162852 | 2.829532  | -0.670987 | C  | -1.645555 | 1.565251  | -1.956065 |
| H  | -2.941690 | 3.559104  | -0.373574 | H  | -2.330560 | 2.365605  | -2.299775 |
| C  | -0.297991 | 3.574958  | 3.249169  | C  | 0.016693  | 4.544429  | 0.825346  |
| H  | 0.685848  | 4.069381  | 3.294235  | H  | 1.059254  | 4.877016  | 0.696400  |
| H  | -0.302947 | 2.764328  | 3.995519  | H  | -0.162755 | 4.408111  | 1.904261  |
| H  | -1.057645 | 4.314562  | 3.554790  | H  | -0.641369 | 5.359226  | 0.478263  |
| C  | -2.508156 | 2.391558  | -2.120553 | C  | -1.950487 | 0.332961  | -2.845876 |
| H  | -3.127032 | 1.481138  | -2.049031 | H  | -2.783756 | -0.215513 | -2.374625 |
| C  | -3.349983 | 3.460473  | -2.814577 | C  | -2.428853 | 0.772053  | -4.228468 |
| H  | -3.605723 | 3.166800  | -3.845494 | H  | -2.653087 | -0.096085 | -4.868974 |
| H  | -2.802601 | 4.416944  | -2.870753 | H  | -1.657715 | 1.369171  | -4.743804 |
| H  | -4.290708 | 3.648488  | -2.272642 | H  | -3.339151 | 1.389347  | -4.164381 |
| C  | -1.312893 | 2.018400  | -2.994748 | C  | -0.804161 | -0.665417 | -2.973987 |
| H  | -1.659906 | 1.602550  | -3.954383 | H  | -1.139626 | -1.570350 | -3.505940 |
| H  | -0.689749 | 1.255122  | -2.504782 | H  | -0.448376 | -0.966603 | -1.978279 |
| H  | -0.678525 | 2.889281  | -3.224606 | H  | 0.047972  | -0.249984 | -3.534614 |
| Cu | 0.458670  | 0.427489  | -0.291628 | Cu | 0.577438  | -0.070325 | 0.369723  |
| N  | 2.309972  | 0.222532  | -0.350584 | N  | 2.376796  | 0.186471  | -0.086059 |
| N  | -2.107446 | -0.638009 | 0.342314  | N  | -2.187871 | -0.419881 | 1.033904  |

## S0-MIN

| Coplanar Geometry |                      |           |           | Perpendicular Geometry |                      |           |           |
|-------------------|----------------------|-----------|-----------|------------------------|----------------------|-----------|-----------|
| Energy            | -1759.220187 Hartree |           |           | Energy                 | -1759.214382 Hartree |           |           |
| Atom              | x                    | y         | z         | Atom                   | x                    | y         | z         |
| C                 | -3.099946            | 1.085672  | -0.169080 | C                      | -3.277772            | 0.489034  | -1.021104 |
| C                 | -2.535602            | 2.371119  | -0.196718 | C                      | -2.895031            | 1.502860  | -1.913947 |
| H                 | -1.451475            | 2.504262  | -0.143250 | H                      | -1.838764            | 1.735605  | -2.065172 |
| C                 | -3.388821            | 3.463982  | -0.291897 | C                      | -3.886259            | 2.191701  | -2.603075 |
| H                 | -2.962839            | 4.471127  | -0.313958 | H                      | -3.599357            | 2.983710  | -3.300438 |
| C                 | -4.786688            | 3.301049  | -0.359825 | C                      | -5.250377            | 1.888837  | -2.425537 |
| H                 | -5.429668            | 4.181689  | -0.434392 | H                      | -6.005141            | 2.449443  | -2.982692 |
| C                 | -5.351984            | 2.029931  | -0.331947 | C                      | -5.638993            | 0.878198  | -1.552349 |
| H                 | -6.437276            | 1.904643  | -0.384151 | H                      | -6.697394            | 0.636363  | -1.419413 |
| C                 | -4.513242            | 0.911637  | -0.235808 | C                      | -4.657940            | 0.169656  | -0.846687 |
| C                 | -4.731734            | -0.513175 | -0.180942 | C                      | -4.688338            | -0.916543 | 0.099080  |
| C                 | -5.868636            | -1.331237 | -0.202483 | C                      | -5.709984            | -1.680701 | 0.677558  |
| H                 | -6.866310            | -0.889200 | -0.276884 | H                      | -6.756281            | -1.483241 | 0.427338  |
| C                 | -5.712844            | -2.711878 | -0.128063 | C                      | -5.377279            | -2.694521 | 1.570023  |
| H                 | -6.591584            | -3.361433 | -0.144012 | H                      | -6.164234            | -3.298986 | 2.027945  |
| C                 | -4.428478            | -3.282191 | -0.030860 | C                      | -4.029071            | -2.951691 | 1.886486  |
| H                 | -4.328160            | -4.369530 | 0.027909  | H                      | -3.786829            | -3.756169 | 2.586523  |
| C                 | -3.285176            | -2.491733 | -0.007659 | C                      | -2.998149            | -2.205901 | 1.327044  |
| H                 | -2.289188            | -2.936351 | 0.068375  | H                      | -1.954534            | -2.413688 | 1.576160  |
| C                 | -3.433825            | -1.098159 | -0.084341 | C                      | -3.324489            | -1.176126 | 0.428862  |
| C                 | 1.544721             | -0.460303 | 0.160267  | C                      | 1.547971             | -0.356885 | 0.155150  |
| C                 | 3.760126             | 0.432585  | 0.297962  | C                      | 3.720547             | 0.193714  | 0.992644  |
| C                 | 3.863911             | -1.100043 | 0.258814  | C                      | 3.877261             | -0.945859 | -0.021663 |
| H                 | 4.479016             | -1.469587 | 1.090309  | H                      | 4.471523             | -1.767107 | 0.400723  |
| H                 | 4.363982             | -1.418767 | -0.665371 | H                      | 4.422060             | -0.586663 | -0.904725 |
| C                 | 2.428842             | -1.672483 | 0.334372  | C                      | 2.460261             | -1.424838 | -0.410319 |
| C                 | 1.688703             | 1.950417  | 0.133053  | C                      | 1.646626             | 1.539770  | 1.664126  |
| C                 | 1.486027             | 2.571635  | -1.117878 | C                      | 1.574794             | 2.824400  | 1.086374  |
| C                 | 0.997134             | 3.882575  | -1.124181 | C                      | 1.106273             | 3.873871  | 1.883104  |
| H                 | 0.833896             | 4.385095  | -2.080227 | H                      | 1.043183             | 4.878399  | 1.458685  |
| C                 | 0.686726             | 4.544724  | 0.057240  | C                      | 0.695731             | 3.657884  | 3.192960  |
| H                 | 0.307896             | 5.569090  | 0.028649  | H                      | 0.338730             | 4.492960  | 3.800354  |
| C                 | 0.814089             | 3.881945  | 1.271989  | C                      | 0.700221             | 2.369548  | 3.713306  |
| H                 | 0.507728             | 4.384536  | 2.192106  | H                      | 0.320414             | 2.197272  | 4.722934  |
| C                 | 1.301144             | 2.572302  | 1.340800  | C                      | 1.159650             | 1.281281  | 2.963825  |
| C                 | 1.648063             | 1.853038  | -2.445834 | C                      | 1.846554             | 3.089494  | -0.383421 |
| H                 | 2.077282             | 0.860351  | -2.249279 | H                      | 2.282689             | 2.181212  | -0.822838 |
| C                 | 0.272299             | 1.628497  | -3.082304 | C                      | 0.515015             | 3.335162  | -1.098098 |
| H                 | 0.368854             | 1.037434  | -4.005756 | H                      | 0.665286             | 3.421745  | -2.185114 |
| H                 | -0.206330            | 2.586214  | -3.340091 | H                      | 0.039966             | 4.262942  | -0.742682 |
| H                 | -0.402894            | 1.089818  | -2.399776 | H                      | -0.186144            | 2.509131  | -0.909404 |
| C                 | 2.573234             | 2.586448  | -3.416690 | C                      | 2.814400             | 4.245818  | -0.627864 |
| H                 | 3.564610             | 2.776668  | -2.981969 | H                      | 3.771265             | 4.102624  | -0.106119 |
| H                 | 2.148822             | 3.556304  | -3.719399 | H                      | 2.389430             | 5.204314  | -0.291935 |
| H                 | 2.710588             | 1.989932  | -4.331748 | H                      | 3.023579             | 4.341712  | -1.704427 |

|    |           |           |           |    |           |           |           |
|----|-----------|-----------|-----------|----|-----------|-----------|-----------|
| C  | 1.275559  | 1.860851  | 2.683167  | C  | 0.999220  | -0.114276 | 3.542270  |
| H  | 1.748130  | 0.877319  | 2.558209  | H  | 1.464870  | -0.828673 | 2.849580  |
| C  | -0.171402 | 1.604914  | 3.116993  | C  | -0.487624 | -0.474447 | 3.620112  |
| H  | -0.723584 | 1.036184  | 2.352925  | H  | -0.979310 | -0.354831 | 2.643211  |
| H  | -0.709362 | 2.550491  | 3.287894  | H  | -1.014661 | 0.167940  | 4.342877  |
| H  | -0.192030 | 1.028089  | 4.054759  | H  | -0.614285 | -1.520043 | 3.941601  |
| C  | 2.033886  | 2.615672  | 3.775027  | C  | 1.658426  | -0.281052 | 4.911301  |
| H  | 2.051786  | 2.022507  | 4.702254  | H  | 1.568929  | -1.325125 | 5.248750  |
| H  | 1.547208  | 3.574788  | 4.010698  | H  | 1.169880  | 0.349667  | 5.670073  |
| H  | 3.073086  | 2.829944  | 3.488230  | H  | 2.725649  | -0.019382 | 4.896370  |
| C  | 4.277294  | 1.017163  | 1.607854  | C  | 4.097132  | -0.230193 | 2.408105  |
| H  | 3.827880  | 0.531329  | 2.484046  | H  | 3.577872  | -1.146753 | 2.717759  |
| H  | 4.089041  | 2.098607  | 1.662702  | H  | 3.879890  | 0.566870  | 3.132651  |
| H  | 5.364210  | 0.860368  | 1.657229  | H  | 5.177785  | -0.429145 | 2.438677  |
| C  | 4.488687  | 1.092955  | -0.865198 | C  | 4.531239  | 1.424090  | 0.608250  |
| H  | 5.567567  | 0.912628  | -0.753767 | H  | 5.599545  | 1.172711  | 0.675216  |
| H  | 4.326122  | 2.180435  | -0.875276 | H  | 4.338086  | 2.265243  | 1.289469  |
| H  | 4.175913  | 0.677102  | -1.832267 | H  | 4.326630  | 1.743974  | -0.421971 |
| C  | 2.177053  | -2.234466 | 1.760039  | C  | 2.150198  | -2.754555 | 0.331819  |
| H  | 3.018555  | -2.916992 | 1.977074  | H  | 3.013277  | -3.418956 | 0.146697  |
| H  | 2.254347  | -1.414276 | 2.494417  | H  | 2.136728  | -2.572491 | 1.420184  |
| C  | 0.875548  | -3.001777 | 1.963200  | C  | 0.885928  | -3.492116 | -0.093651 |
| H  | 0.033064  | -2.306855 | 1.786320  | H  | 0.015673  | -2.845814 | 0.125752  |
| C  | 0.777860  | -4.119348 | 0.930500  | C  | 0.915388  | -3.723651 | -1.600065 |
| H  | 1.575054  | -4.860828 | 1.127789  | H  | 1.747770  | -4.411900 | -1.840962 |
| H  | -0.180227 | -4.653781 | 1.043763  | H  | -0.011209 | -4.227049 | -1.921568 |
| C  | 0.912707  | -3.581618 | -0.485720 | C  | 1.089212  | -2.415934 | -2.356859 |
| H  | 0.050541  | -2.928649 | -0.703306 | H  | 0.199225  | -1.786973 | -2.186570 |
| H  | 0.860623  | -4.408734 | -1.212111 | H  | 1.126489  | -2.607243 | -3.441592 |
| C  | 2.212394  | -2.807916 | -0.707317 | C  | 2.350644  | -1.655925 | -1.946238 |
| H  | 3.034031  | -3.510274 | -0.470090 | H  | 3.197873  | -2.340393 | -2.142561 |
| C  | 0.767858  | -3.519521 | 3.389881  | C  | 0.720327  | -4.784348 | 0.692007  |
| H  | -0.178339 | -4.061200 | 3.543315  | H  | -0.202895 | -5.307972 | 0.399358  |
| H  | 0.807343  | -2.695604 | 4.119931  | H  | 0.669892  | -4.591751 | 1.775596  |
| H  | 1.593193  | -4.213848 | 3.621640  | H  | 1.566601  | -5.468616 | 0.511646  |
| C  | 2.416716  | -2.383205 | -2.184838 | C  | 2.604362  | -0.394442 | -2.811970 |
| H  | 3.102531  | -1.517816 | -2.190159 | H  | 3.255524  | 0.282646  | -2.231338 |
| C  | 3.108018  | -3.496551 | -2.969192 | C  | 3.373460  | -0.762099 | -4.079386 |
| H  | 2.502254  | -4.417868 | -2.963038 | H  | 2.804244  | -1.480084 | -4.692576 |
| H  | 4.093014  | -3.740843 | -2.541273 | H  | 4.346030  | -1.221491 | -3.842662 |
| H  | 3.257199  | -3.208168 | -4.021405 | H  | 3.560571  | 0.126369  | -4.702383 |
| C  | 1.146101  | -1.942058 | -2.907003 | C  | 1.351613  | 0.401483  | -3.169129 |
| H  | 1.397285  | -1.519809 | -3.892206 | H  | 1.630127  | 1.346977  | -3.659507 |
| H  | 0.590748  | -1.175259 | -2.347015 | H  | 0.748820  | 0.650745  | -2.282974 |
| H  | 0.461540  | -2.787595 | -3.076101 | H  | 0.702141  | -0.152592 | -3.864239 |
| Au | -0.441278 | -0.357764 | 0.037454  | Au | -0.442440 | -0.277740 | -0.052504 |
| N  | -2.459409 | -0.128984 | -0.079970 | N  | -2.484273 | -0.318845 | -0.242099 |
| N  | 2.271890  | 0.629121  | 0.176624  | N  | 2.237886  | 0.465379  | 0.901912  |

## S1-MIN

| Coplanar Geometry |                      |           |           | Perpendicular Geometry |                      |           |           |
|-------------------|----------------------|-----------|-----------|------------------------|----------------------|-----------|-----------|
| Energy            | -1759.112216 Hartree |           |           | Energy                 | -1759.114077 Hartree |           |           |
| Atom              | x                    | y         | z         | Atom                   | x                    | y         | z         |
| C                 | -3.186743            | 0.958466  | -0.243068 | C                      | -3.269686            | 0.439409  | -1.139904 |
| C                 | -2.613086            | 2.237257  | -0.352449 | C                      | -2.779392            | 1.321467  | -2.112281 |
| H                 | -1.528900            | 2.367490  | -0.311217 | H                      | -1.705045            | 1.467898  | -2.230035 |
| C                 | -3.474342            | 3.321358  | -0.512229 | C                      | -3.704789            | 1.988029  | -2.914711 |
| H                 | -3.058005            | 4.327085  | -0.599710 | H                      | -3.352129            | 2.681279  | -3.680697 |
| C                 | -4.861480            | 3.137540  | -0.560020 | C                      | -5.078341            | 1.778914  | -2.751047 |
| H                 | -5.513319            | 4.004677  | -0.686033 | H                      | -5.782284            | 2.315297  | -3.390735 |
| C                 | -5.438677            | 1.856715  | -0.445870 | C                      | -5.573848            | 0.887672  | -1.780800 |
| H                 | -6.523959            | 1.738318  | -0.480480 | H                      | -6.649413            | 0.733653  | -1.671566 |
| C                 | -4.602938            | 0.765854  | -0.287479 | C                      | -4.668454            | 0.216532  | -0.978804 |
| C                 | -4.794615            | -0.669215 | -0.127989 | C                      | -4.779573            | -0.767229 | 0.090974  |
| C                 | -5.889778            | -1.513260 | -0.074498 | C                      | -5.833021            | -1.409897 | 0.715925  |
| H                 | -6.907324            | -1.126643 | -0.165520 | H                      | -6.868171            | -1.204951 | 0.434738  |
| C                 | -5.669061            | -2.892894 | 0.102796  | C                      | -5.542797            | -2.343931 | 1.728134  |
| H                 | -6.526530            | -3.567849 | 0.145394  | H                      | -6.365069            | -2.858365 | 2.229828  |
| C                 | -4.376108            | -3.416946 | 0.224879  | C                      | -4.224755            | -2.630206 | 2.100013  |
| H                 | -4.242039            | -4.492012 | 0.360590  | H                      | -4.033359            | -3.365593 | 2.883797  |
| C                 | -3.259058            | -2.584617 | 0.172889  | C                      | -3.151827            | -1.989837 | 1.480984  |
| H                 | -2.241833            | -2.972628 | 0.260263  | H                      | -2.116764            | -2.204935 | 1.751149  |
| C                 | -3.476255            | -1.208582 | -0.002073 | C                      | -3.437991            | -1.050921 | 0.480488  |
| C                 | 1.564794             | -0.416095 | 0.039462  | C                      | 1.509603             | -0.340910 | 0.109061  |
| C                 | 3.721596             | 0.633949  | 0.324905  | C                      | 3.691645             | 0.209032  | 1.006994  |
| C                 | 3.911132             | -0.871275 | 0.055537  | C                      | 3.849937             | -0.800075 | -0.143123 |
| H                 | 4.660561             | -1.305937 | 0.733343  | H                      | 4.569763             | -1.590985 | 0.114755  |
| H                 | 4.294469             | -1.008001 | -0.965184 | H                      | 4.257385             | -0.279659 | -1.021032 |
| C                 | 2.535438             | -1.561580 | 0.207114  | C                      | 2.454633             | -1.380258 | -0.467753 |
| C                 | 1.584219             | 2.028397  | 0.192237  | C                      | 1.635267             | 1.507114  | 1.738616  |
| C                 | 1.331021             | 2.678178  | -1.040705 | C                      | 1.488026             | 2.799661  | 1.180433  |
| C                 | 0.733757             | 3.944685  | -1.025305 | C                      | 0.983025             | 3.829732  | 1.982177  |
| H                 | 0.548234             | 4.459915  | -1.971462 | H                      | 0.880062             | 4.834126  | 1.562726  |
| C                 | 0.353774             | 4.549171  | 0.167948  | C                      | 0.594852             | 3.594978  | 3.296683  |
| H                 | -0.103971            | 5.541874  | 0.160858  | H                      | 0.212349             | 4.413529  | 3.912192  |
| C                 | 0.525902             | 3.865999  | 1.366668  | C                      | 0.663877             | 2.305252  | 3.811397  |
| H                 | 0.177426             | 4.319666  | 2.298209  | H                      | 0.309583             | 2.112649  | 4.827693  |
| C                 | 1.118412             | 2.597937  | 1.402633  | C                      | 1.161067             | 1.243598  | 3.046054  |
| C                 | 1.598409             | 2.016328  | -2.380519 | C                      | 1.767013             | 3.081643  | -0.284346 |
| H                 | 2.104877             | 1.061922  | -2.178921 | H                      | 2.218156             | 2.174342  | -0.710151 |
| C                 | 0.276776             | 1.678722  | -3.076634 | C                      | 0.446655             | 3.308669  | -1.024304 |
| H                 | 0.464484             | 1.143390  | -4.020856 | H                      | 0.617797             | 3.408435  | -2.108191 |
| H                 | -0.297428            | 2.589951  | -3.311372 | H                      | -0.058922            | 4.222868  | -0.672701 |
| H                 | -0.346674            | 1.033895  | -2.438563 | H                      | -0.230650            | 2.457873  | -0.858066 |
| C                 | 2.483400             | 2.861923  | -3.296667 | C                      | 2.717286             | 4.257765  | -0.505191 |
| H                 | 3.430201             | 3.140069  | -2.811933 | H                      | 3.664785             | 4.127437  | 0.037259  |
| H                 | 1.977247             | 3.792643  | -3.598988 | H                      | 2.269587             | 5.207554  | -0.171552 |
| H                 | 2.722031             | 2.306459  | -4.217443 | H                      | 2.950008             | 4.366019  | -1.576498 |
| C                 | 1.153666             | 1.850376  | 2.723655  | C                      | 1.074466             | -0.163642 | 3.608001  |

|    |           |           |           |    |           |           |           |
|----|-----------|-----------|-----------|----|-----------|-----------|-----------|
| H  | 1.674892  | 0.900509  | 2.544070  | H  | 1.549508  | -0.832273 | 2.877658  |
| C  | -0.266296 | 1.502192  | 3.180627  | C  | -0.392281 | -0.588856 | 3.716927  |
| H  | -0.791948 | 0.915945  | 2.410389  | H  | -0.901382 | -0.459174 | 2.750250  |
| H  | -0.857422 | 2.409437  | 3.386294  | H  | -0.930006 | 0.009401  | 4.470498  |
| H  | -0.236314 | 0.901791  | 4.103983  | H  | -0.469956 | -1.649029 | 4.008284  |
| C  | 1.888416  | 2.615723  | 3.824497  | C  | 1.774438  | -0.326239 | 4.956622  |
| H  | 1.960788  | 2.000909  | 4.735538  | H  | 1.738932  | -1.378063 | 5.282152  |
| H  | 1.353521  | 3.540066  | 4.095389  | H  | 1.283781  | 0.274335  | 5.739233  |
| H  | 2.907729  | 2.897240  | 3.524529  | H  | 2.829646  | -0.021105 | 4.915458  |
| C  | 4.222944  | 1.034586  | 1.714305  | C  | 4.139201  | -0.379830 | 2.347565  |
| H  | 3.761743  | 0.431445  | 2.507662  | H  | 3.616820  | -1.317533 | 2.579253  |
| H  | 4.008921  | 2.094693  | 1.912508  | H  | 3.954353  | 0.332710  | 3.164355  |
| H  | 5.313039  | 0.894298  | 1.771964  | H  | 5.219228  | -0.590451 | 2.322377  |
| C  | 4.465555  | 1.478744  | -0.708453 | C  | 4.517562  | 1.468907  | 0.748419  |
| H  | 5.550801  | 1.339884  | -0.589179 | H  | 5.589859  | 1.222627  | 0.776254  |
| H  | 4.245548  | 2.549964  | -0.581553 | H  | 4.327065  | 2.236951  | 1.513842  |
| H  | 4.198502  | 1.185954  | -1.732486 | H  | 4.295810  | 1.897424  | -0.237959 |
| C  | 2.447611  | -2.173448 | 1.632610  | C  | 2.310239  | -2.744759 | 0.258319  |
| H  | 3.336969  | -2.815015 | 1.789045  | H  | 3.186992  | -3.372157 | 0.003599  |
| H  | 2.517023  | -1.359531 | 2.373125  | H  | 2.355745  | -2.573383 | 1.346529  |
| C  | 1.207823  | -3.014576 | 1.906219  | C  | 1.055137  | -3.535774 | -0.085340 |
| H  | 0.325317  | -2.360092 | 1.764146  | H  | 0.184253  | -2.906687 | 0.185488  |
| C  | 1.121571  | -4.134572 | 0.875556  | C  | 1.003847  | -3.769409 | -1.590928 |
| H  | 1.974541  | -4.824621 | 1.024016  | H  | 1.850088  | -4.422242 | -1.880291 |
| H  | 0.206893  | -4.731628 | 1.036622  | H  | 0.082961  | -4.314335 | -1.862133 |
| C  | 1.146685  | -3.582186 | -0.541788 | C  | 1.082553  | -2.456274 | -2.355552 |
| H  | 0.236758  | -2.978252 | -0.702590 | H  | 0.176222  | -1.864881 | -2.136532 |
| H  | 1.103909  | -4.408862 | -1.270870 | H  | 1.070672  | -2.650143 | -3.441615 |
| C  | 2.377682  | -2.718587 | -0.824397 | C  | 2.322692  | -1.633625 | -2.000187 |
| H  | 3.255325  | -3.367610 | -0.633890 | H  | 3.189628  | -2.282231 | -2.236265 |
| C  | 1.189012  | -3.537426 | 3.334589  | C  | 0.971614  | -4.831587 | 0.707103  |
| H  | 0.282188  | -4.131599 | 3.532427  | H  | 0.053167  | -5.391245 | 0.466608  |
| H  | 1.217004  | -2.711558 | 4.063685  | H  | 0.975268  | -4.638122 | 1.792118  |
| H  | 2.060907  | -4.184863 | 3.530925  | H  | 1.829800  | -5.488544 | 0.483789  |
| C  | 2.469939  | -2.288264 | -2.312825 | C  | 2.474835  | -0.371359 | -2.892202 |
| H  | 3.017862  | -1.330959 | -2.343995 | H  | 3.014877  | 0.385944  | -2.298815 |
| C  | 3.283507  | -3.303320 | -3.113348 | C  | 3.330783  | -0.684781 | -4.117953 |
| H  | 2.813619  | -4.301086 | -3.076699 | H  | 2.867480  | -1.478586 | -4.728701 |
| H  | 4.306924  | -3.404142 | -2.717658 | H  | 4.335977  | -1.032602 | -3.830258 |
| H  | 3.357508  | -3.013827 | -4.174092 | H  | 3.450561  | 0.199857  | -4.764229 |
| C  | 1.130453  | -2.029322 | -2.998925 | C  | 1.166696  | 0.289464  | -3.321172 |
| H  | 1.295354  | -1.601311 | -4.000943 | H  | 1.375480  | 1.235617  | -3.846406 |
| H  | 0.521135  | -1.318715 | -2.421947 | H  | 0.539811  | 0.516259  | -2.446605 |
| H  | 0.549808  | -2.956498 | -3.130513 | H  | 0.587377  | -0.347215 | -4.008859 |
| Au | -0.433255 | -0.400212 | 0.044617  | Au | -0.474145 | -0.312629 | -0.027232 |
| N  | -2.535941 | -0.225494 | -0.070713 | N  | -2.542839 | -0.312928 | -0.252047 |
| N  | 2.254537  | 0.773111  | 0.203911  | N  | 2.238627  | 0.474454  | 0.972620  |

## T1-MIN

| Coplanar Geometry |                      |           |           | Perpendicular Geometry |                      |           |           |
|-------------------|----------------------|-----------|-----------|------------------------|----------------------|-----------|-----------|
| Energy            | -1759.119055 Hartree |           |           | Energy                 | -1759.114496 Hartree |           |           |
| Atom              | x                    | y         | z         | Atom                   | x                    | y         | z         |
| C                 | -3.160334            | 0.976888  | -0.148447 | C                      | -3.290638            | 0.469972  | -1.086114 |
| C                 | -2.589408            | 2.257858  | -0.175416 | C                      | -2.825267            | 1.404424  | -2.020697 |
| H                 | -1.505498            | 2.388260  | -0.133048 | H                      | -1.754655            | 1.575903  | -2.139762 |
| C                 | -3.454529            | 3.348651  | -0.258515 | C                      | -3.769785            | 2.089936  | -2.783867 |
| H                 | -3.040503            | 4.358767  | -0.280971 | H                      | -3.436862            | 2.824355  | -3.519731 |
| C                 | -4.840319            | 3.164359  | -0.313454 | C                      | -5.137814            | 1.847571  | -2.619091 |
| H                 | -5.494845            | 4.036145  | -0.378554 | H                      | -5.857092            | 2.399469  | -3.227783 |
| C                 | -5.413318            | 1.877407  | -0.286798 | C                      | -5.608096            | 0.903382  | -1.687372 |
| H                 | -6.497808            | 1.756056  | -0.329829 | H                      | -6.679524            | 0.723598  | -1.577036 |
| C                 | -4.571277            | 0.783153  | -0.204545 | C                      | -4.683332            | 0.213493  | -0.924159 |
| C                 | -4.761756            | -0.662489 | -0.152039 | C                      | -4.766891            | -0.820076 | 0.100247  |
| C                 | -5.860020            | -1.503687 | -0.164434 | C                      | -5.803281            | -1.509276 | 0.704081  |
| H                 | -6.875936            | -1.107904 | -0.226989 | H                      | -6.844307            | -1.311368 | 0.439861  |
| C                 | -5.641378            | -2.892857 | -0.093617 | C                      | -5.487678            | -2.480864 | 1.672149  |
| H                 | -6.499790            | -3.567849 | -0.102851 | H                      | -6.296140            | -3.032251 | 2.156770  |
| C                 | -4.350177            | -3.426609 | -0.011743 | C                      | -4.161608            | -2.756908 | 2.022635  |
| H                 | -4.217378            | -4.508933 | 0.041546  | H                      | -3.950261            | -3.520756 | 2.773386  |
| C                 | -3.231623            | -2.593693 | 0.001913  | C                      | -3.105689            | -2.069858 | 1.424583  |
| H                 | -2.215755            | -2.989268 | 0.063322  | H                      | -2.064665            | -2.273950 | 1.680833  |
| C                 | -3.448222            | -1.210858 | -0.068916 | C                      | -3.417321            | -1.095993 | 0.466088  |
| C                 | 1.543434             | -0.423739 | 0.066600  | C                      | 1.508820             | -0.333210 | 0.099418  |
| C                 | 3.717236             | 0.626066  | 0.257353  | C                      | 3.688655             | 0.199918  | 1.012264  |
| C                 | 3.891345             | -0.891057 | 0.052485  | C                      | 3.846156             | -0.810953 | -0.136156 |
| H                 | 4.653069             | -1.299649 | 0.733015  | H                      | 4.562215             | -1.604574 | 0.123903  |
| H                 | 4.252424             | -1.075653 | -0.968892 | H                      | 4.257308             | -0.292300 | -1.013499 |
| C                 | 2.515910             | -1.566461 | 0.263379  | C                      | 2.448943             | -1.384577 | -0.464061 |
| C                 | 1.589546             | 2.030262  | 0.110065  | C                      | 1.638647             | 1.525644  | 1.715592  |
| C                 | 1.315131             | 2.638384  | -1.139514 | C                      | 1.515268             | 2.817426  | 1.150022  |
| C                 | 0.726431             | 3.908916  | -1.158405 | C                      | 1.008563             | 3.856621  | 1.938770  |
| H                 | 0.525769             | 4.391402  | -2.118645 | H                      | 0.923440             | 4.860166  | 1.513361  |
| C                 | 0.374931             | 4.558898  | 0.019561  | C                      | 0.596549             | 3.631849  | 3.247709  |
| H                 | -0.075660            | 5.554380  | -0.014069 | H                      | 0.212913             | 4.457118  | 3.853459  |
| C                 | 0.565716             | 3.917196  | 1.238469  | C                      | 0.643750             | 2.343829  | 3.769096  |
| H                 | 0.238227             | 4.406046  | 2.159835  | H                      | 0.271766             | 2.159910  | 4.780673  |
| C                 | 1.150434             | 2.646683  | 1.307754  | C                      | 1.141280             | 1.273079  | 3.016719  |
| C                 | 1.554341             | 1.927058  | -2.459049 | C                      | 1.822163             | 3.089253  | -0.311051 |
| H                 | 2.054631             | 0.975614  | -2.229844 | H                      | 2.274360             | 2.176574  | -0.723772 |
| C                 | 0.218855             | 1.578039  | -3.122120 | C                      | 0.516857             | 3.319774  | -1.075723 |
| H                 | 0.386161             | 1.002635  | -4.046489 | H                      | 0.707907             | 3.414988  | -2.156643 |
| H                 | -0.348477            | 2.485796  | -3.385304 | H                      | 0.008265             | 4.236778  | -0.735927 |
| H                 | -0.401524            | 0.966610  | -2.448949 | H                      | -0.165423            | 2.471413  | -0.918564 |
| C                 | 2.432584             | 2.730404  | -3.418568 | C                      | 2.784707             | 4.257139  | -0.521488 |
| H                 | 3.390308             | 3.014500  | -2.959502 | H                      | 3.721245             | 4.122877  | 0.038844  |
| H                 | 1.931212             | 3.655741  | -3.744659 | H                      | 2.338207             | 5.212172  | -0.201513 |
| H                 | 2.649945             | 2.140861  | -4.323339 | H                      | 3.037585             | 4.357358  | -1.588990 |
| C                 | 1.205766             | 1.944838  | 2.652864  | C                      | 1.033270             | -0.129523 | 3.586925  |

|    |           |           |           |    |           |           |           |
|----|-----------|-----------|-----------|----|-----------|-----------|-----------|
| H  | 1.723365  | 0.989129  | 2.496722  | H  | 1.504557  | -0.808785 | 2.863858  |
| C  | -0.207085 | 1.612766  | 3.142162  | C  | -0.438846 | -0.537393 | 3.692819  |
| H  | -0.741381 | 0.997351  | 2.401452  | H  | -0.944177 | -0.410443 | 2.723695  |
| H  | -0.796654 | 2.526477  | 3.322481  | H  | -0.972536 | 0.072071  | 4.440203  |
| H  | -0.163575 | 1.046861  | 4.086566  | H  | -0.529020 | -1.594270 | 3.992299  |
| C  | 1.957912  | 2.745958  | 3.715683  | C  | 1.723862  | -0.290657 | 4.940785  |
| H  | 2.044275  | 2.162020  | 4.645655  | H  | 1.674067  | -1.339585 | 5.273730  |
| H  | 1.428398  | 3.679698  | 3.964085  | H  | 1.235681  | 0.321529  | 5.715919  |
| H  | 2.972690  | 3.015473  | 3.390176  | H  | 2.782734  | 0.001806  | 4.903811  |
| C  | 4.248134  | 1.081971  | 1.618854  | C  | 4.112357  | -0.394308 | 2.358277  |
| H  | 3.799027  | 0.515440  | 2.445454  | H  | 3.571967  | -1.322578 | 2.586171  |
| H  | 4.042963  | 2.150657  | 1.776935  | H  | 3.930408  | 0.322858  | 3.171596  |
| H  | 5.338423  | 0.938076  | 1.662392  | H  | 5.188981  | -0.622676 | 2.345229  |
| C  | 4.451754  | 1.416965  | -0.824639 | C  | 4.534724  | 1.448478  | 0.764247  |
| H  | 5.537841  | 1.273281  | -0.719333 | H  | 5.603035  | 1.187581  | 0.807498  |
| H  | 4.243499  | 2.494882  | -0.741085 | H  | 4.344015  | 2.219615  | 1.526512  |
| H  | 4.162880  | 1.082886  | -1.830068 | H  | 4.333213  | 1.879460  | -0.225328 |
| C  | 2.455878  | -2.119517 | 1.711935  | C  | 2.292081  | -2.743938 | 0.268843  |
| H  | 3.342098  | -2.763033 | 1.878540  | H  | 3.167125  | -3.377415 | 0.023518  |
| H  | 2.545575  | -1.277199 | 2.417834  | H  | 2.331153  | -2.567121 | 1.356326  |
| C  | 1.213662  | -2.936487 | 2.041449  | C  | 1.035275  | -3.530644 | -0.078446 |
| H  | 0.335342  | -2.279903 | 1.885118  | H  | 0.165909  | -2.895274 | 0.182180  |
| C  | 1.102461  | -4.099131 | 1.061312  | C  | 0.992775  | -3.773050 | -1.582764 |
| H  | 1.953534  | -4.787900 | 1.225665  | H  | 1.838361  | -4.430654 | -1.863035 |
| H  | 0.186932  | -4.682479 | 1.262847  | H  | 0.071519  | -4.315920 | -1.856809 |
| C  | 1.107908  | -3.609842 | -0.379393 | C  | 1.080992  | -2.464215 | -2.353485 |
| H  | 0.197556  | -3.010281 | -0.553380 | H  | 0.175710  | -1.868468 | -2.142213 |
| H  | 1.051578  | -4.467673 | -1.070637 | H  | 1.074154  | -2.663270 | -3.438636 |
| C  | 2.335563  | -2.762098 | -0.718515 | C  | 2.322277  | -1.644294 | -1.995869 |
| H  | 3.213523  | -3.408265 | -0.519938 | H  | 3.188043  | -2.296469 | -2.226245 |
| C  | 1.212163  | -3.398315 | 3.490928  | C  | 0.939134  | -4.820773 | 0.721729  |
| H  | 0.303599  | -3.975256 | 3.727980  | H  | 0.019065  | -5.376652 | 0.478673  |
| H  | 1.258782  | -2.542561 | 4.183737  | H  | 0.936715  | -4.620348 | 1.805492  |
| H  | 2.081493  | -4.044814 | 3.701299  | H  | 1.794979  | -5.484035 | 0.508357  |
| C  | 2.402335  | -2.387856 | -2.224518 | C  | 2.481030  | -0.384469 | -2.890489 |
| H  | 2.920560  | -1.416500 | -2.297063 | H  | 3.011394  | 0.376391  | -2.292949 |
| C  | 3.239227  | -3.409763 | -2.991480 | C  | 3.352124  | -0.699112 | -4.105150 |
| H  | 2.798174  | -4.418194 | -2.911180 | H  | 2.898241  | -1.496270 | -4.718638 |
| H  | 4.267549  | -3.465945 | -2.599516 | H  | 4.354891  | -1.043126 | -3.804664 |
| H  | 3.298406  | -3.160921 | -4.063484 | H  | 3.476863  | 0.183810  | -4.752858 |
| C  | 1.052347  | -2.193925 | -2.912023 | C  | 1.175932  | 0.270884  | -3.337173 |
| H  | 1.201794  | -1.812265 | -3.935055 | H  | 1.388438  | 1.216750  | -3.861411 |
| H  | 0.431161  | -1.468341 | -2.367082 | H  | 0.536093  | 0.497702  | -2.471957 |
| H  | 0.491873  | -3.138971 | -2.994080 | H  | 0.608246  | -0.369011 | -4.031536 |
| Au | -0.442745 | -0.396730 | 0.040957  | Au | -0.474256 | -0.300361 | -0.035698 |
| N  | -2.501342 | -0.221563 | -0.065608 | N  | -2.541907 | -0.309563 | -0.240629 |
| N  | 2.251562  | 0.772776  | 0.153658  | N  | 2.239635  | 0.483600  | 0.960446  |
